1 **Using DNA metabarcoding to investigate diet and niche partitioning**  
2 **in the native European otter (*Lutra lutra*) and invasive American**  
3 **mink (*Neovison vison*)**  
4

5  
6 **Lynsey R. Harper<sup>1,2\*</sup>, Hayley V. Watson<sup>1</sup>, Robert Donnelly<sup>1</sup>, Richard**  
7 **Hampshire<sup>3</sup>, Carl D. Sayer<sup>4</sup>, Thomas Breithaupt<sup>1</sup>, Bernd Hänfling<sup>1</sup>**  
8

9  
10 <sup>1</sup> Department of Biological and Marine Sciences, University of Hull, Hull, HU6 7RX,  
11 UK

12 <sup>2</sup> School of Biological and Environmental Sciences, Liverpool John Moores  
13 University, Liverpool, L3 3AF, UK

14 <sup>3</sup> Yorkshire Water, Tophill Low Nature Reserve, Driffield, YO25 9RH, UK

15 <sup>4</sup> Pond Restoration Research Group, Environmental Change Research Centre,  
16 Department of Geography, University College London, London, UK  
17

18  
19 **\*Corresponding author:**

20 Lynsey Harper, [lynsey.harper2@gmail.com](mailto:lynsey.harper2@gmail.com)

21 School of Natural Sciences and Psychology, Liverpool John Moores University,  
22 Liverpool, L3 3AF, UK  
23

24  
25 **Manuscript type:** Article

26 **Running title:** mustelid diet assessment using DNA metabarcoding  
27  
28

29 **Abstract**

30

31 In the UK, the native European otter (*Lutra lutra*) and invasive American mink  
32 (*Neovison vison*) have experienced concurrent declines and expansions. Currently,  
33 the otter is recovering from persecution and waterway pollution, whereas the mink is  
34 in decline due to population control and probable interspecific interaction with the  
35 otter. We explored the potential of DNA metabarcoding for investigating diet and  
36 niche partitioning between these mustelids. Otter spraints ( $n = 171$ ) and mink scats  
37 ( $n = 19$ ) collected from three sites (Malham Tarn, River Hull, and River Glaven) in  
38 northern and eastern England were screened for vertebrates using high-throughput  
39 sequencing. Otter diet mainly comprised aquatic fishes (81.0%) and amphibians  
40 (12.7%), whereas mink diet predominantly consisted of terrestrial birds (55.9%) and  
41 mammals (39.6%). The mink used a lower proportion (20%) of available prey ( $n = 40$   
42 taxa) than the otter, and low niche overlap (0.267) was observed between these  
43 mustelids. Prey taxon richness of mink scats was lower than otter spraints, and beta  
44 diversity of prey communities was driven by taxon turnover (i.e. the otter and mink  
45 consumed different prey taxa). Considering otter diet only, prey taxon richness was  
46 higher in spraints from the River Hull catchment, and beta diversity of prey  
47 communities was driven by taxon turnover (i.e. the otter consumed different prey  
48 taxa at each site). Studies using morphological faecal analysis may misidentify the  
49 predator as well as prey items. Faecal DNA metabarcoding can resolve these issues  
50 and provide more accurate and detailed dietary information. When upscaled across  
51 multiple habitat types, DNA metabarcoding should greatly improve future  
52 understanding of resource use and niche overlap between the otter and mink.

53

54

55 **Key Words:** carnivore, faecal DNA, high-throughput sequencing, mustelid, predator-  
56 prey interactions, scats, spraints, trophic ecology

57

58

## 59 Introduction

60

61 Dietary studies play a fundamental role in ecological research through revealing the  
62 feeding ecology of key species, the degree of resource overlap between species,  
63 and reconstructing complex trophic networks (Martínez-Gutiérrez et al. 2015).  
64 Morphological faecal analysis is a common method used to infer diet composition,  
65 especially in vertebrates. For example, morphological identification of prey item  
66 components from faeces has frequently been used to understand feeding ecology  
67 and resource overlap in mustelid predators, such as the European otter (*Lutra lutra*)  
68 and American mink (*Neovison vison*) (Jędrzejewska et al. 2001; Bonesi et al. 2004;  
69 Melero et al. 2008). However, morphological faecal analysis can be time-consuming,  
70 and accuracy hinges on possessing the necessary expertise to identify both the  
71 predator and its prey (Pompanon et al. 2012; Martínez-Gutiérrez et al. 2015;  
72 Traugott et al. 2020). Carnivore scats can be misidentified during field collection, with  
73 especially high error rates for sympatric species with morphologically similar scats  
74 and low density carnivores whose scats are sparse (Davison et al. 2002; Akrim et al.  
75 2018). Prey detection from predator faeces may be influenced by differential  
76 digestion of soft-bodied and hard-bodied prey, and variable gut transition times for  
77 different prey components (e.g. hair, feather, teeth, bones, scales, shell) and prey  
78 types (e.g. fish, amphibian, bird, mammal) (Carss and Parkinson 1996; Krawczyk et  
79 al. 2016; Nielsen et al. 2018). Digestion can be influenced by species identity, life  
80 stage, and activity of predators as well as environmental variables (King et al. 2008;  
81 McInnes et al. 2016; Traugott et al. 2020). Smaller prey are less likely to be  
82 recovered from faeces, prey components may be fragmented or damaged beyond  
83 recognition, and prey components from related species can be morphologically  
84 similar. These issues individually or combined can prevent species-level  
85 identification for various taxa, especially fishes (e.g. closely related cyprinids) and  
86 birds (Britton et al. 2006, 2017; Shehzad et al. 2012a; Krawczyk et al. 2016; Berry et  
87 al. 2017; Smioldo et al. 2019; Traugott et al. 2020).

88

89 Molecular tools offer a rapid, non-invasive, cost-efficient alternative to morphological  
90 faecal analysis for identification of predator and prey. Single or multiple prey species  
91 within a taxonomic group can be targeted using species- or group-specific DNA  
92 barcodes, or prey species across multiple taxonomic groups can be assessed in  
93 parallel using generic DNA metabarcodes with high-throughput sequencing, i.e. DNA  
94 metabarcoding (Pompanon et al. 2012; McInnes et al. 2016; Traugott et al. 2020).  
95 DNA metabarcoding cannot provide information on cannibalism, or size, life stage,  
96 and vital status of prey taxa, and is not immune to retention of prey taxa due to  
97 differential digestion and gut transition times. Nonetheless, it perpetuates non-  
98 invasiveness and has greater sensitivity toward rare, soft, liquid or highly degraded  
99 prey items, e.g. jellyfish in faeces of marine predators (Shehzad et al. 2012b;  
100 McInnes et al. 2017; Nielsen et al. 2018; Traugott et al. 2020). As such, DNA  
101 metabarcoding provides species resolution data at greater spatiotemporal scales for  
102 the vast majority of prey items, regardless of prey size, type, and integrity or lack of  
103 hard components (Oehm et al. 2011; Pompanon et al. 2012; McInnes et al. 2017;  
104 Forin-Wiart et al. 2018; Traugott et al. 2020). Since its inception, DNA  
105 metabarcoding has been employed to assess the diet of various mammalian  
106 predators (Shehzad et al. 2012a, 2012b; De Barba et al. 2014; Berry et al. 2017;  
107 Gosselin et al. 2017; Forin-Wiart et al. 2018; Robeson et al. 2018; Schwarz et al.

108 2018), and recent small-scale studies have shown its potential for European otter  
109 (hereafter otter) diet analysis (Buglione et al. 2020; Martínez-Abraín et al. 2020).

110  
111 Dietary niche characterisation of the otter is important as this is a keystone species  
112 and an apex predator of freshwater ecosystems in Europe. In the UK, the otter was  
113 common and widespread until the 18th century, after which the population declined  
114 sharply due to persecution, bioaccumulation of polychlorinated biphenyls (PCBs),  
115 and organochlorine pesticide poisoning, resulting in local extinctions over large tracts  
116 of its former range (Britton et al. 2006; McDonald et al. 2007; Harrington et al. 2009;  
117 Reid et al. 2013; Smiroldo et al. 2019). However, legal protection, pesticide bans,  
118 water quality and habitat improvement, and targeted otter releases since the 1980s  
119 allowed the species to recover (Bonesi and Macdonald, 2004a; Britton et al. 2006;  
120 McDonald et al. 2007; Alderton et al. 2015; Martínez-Abraín et al. 2020). Conversely,  
121 the American mink (hereafter mink) was introduced from America to Europe for fur  
122 farming in the 1920s, and became established in the wild and invasive across  
123 Europe following fur farm escapees and intentional releases (Bonesi and Macdonald  
124 2004b; Reynolds et al. 2004; Bonesi and Palazon 2007; Harrington et al. 2009). In  
125 the UK, rapid countrywide spread of the mink has been documented since the 1950s  
126 (Bonesi and Macdonald 2004b; Reynolds et al. 2004). This mustelid has had acutely  
127 devastating effects on native UK biodiversity, including the European water vole  
128 (*Arvicola amphibius*) and ground-nesting seabirds (Bonesi and Macdonald 2004a,  
129 2004b; Reynolds et al. 2004), due to direct predation. The species has also proven  
130 economically damaging, with poultry runs, gamebird rearing, and fisheries all  
131 negatively affected by mink activity (Bonesi and Palazon 2007).

132  
133 Initially, there was misplaced belief that the mink had contributed to the decline of the  
134 otter through competition due to simultaneous changes in distribution and  
135 abundance of these two mustelids (McDonald et al. 2007). However, studies on  
136 interspecific aggression and intraguild predation have shown that the otter is more  
137 likely to be the victor in encounters between these mustelids due to its larger body  
138 size, heavier weight, and better swimming/diving skills (Bonesi and Macdonald  
139 2004a; Bonesi et al. 2004; Melero et al. 2008; Harrington et al. 2009). Furthermore,  
140 declines in mink site occupancy and density have been linked to otter recovery at  
141 fine and broad spatiotemporal scales (Bonesi and Macdonald 2004a; McDonald et  
142 al. 2007). The otter has been classed as a specialist or generalist predator, whereas  
143 the mink is typically considered to be an opportunist (Jędrzejewska et al. 2001;  
144 Bonesi and Macdonald 2004b; Melero et al. 2008; Almeida et al. 2012, 2013; Reid et  
145 al. 2013). Evidence indicates that the otter outcompetes the mink for aquatic prey,  
146 resulting in the mink seeking out terrestrial prey and undergoing a feeding niche shift  
147 where these mustelids are sympatric (Jędrzejewska et al. 2001; Bonesi et al. 2004;  
148 Melero et al. 2008; Harrington et al. 2009). Indeed, niche overlap between the otter  
149 and mink has been found to be lower in winter than spring, possibly due to restricted  
150 resources (Jędrzejewska et al. 2001; Bonesi et al. 2004). Additionally, both species  
151 have been found to consume different prey in response to water body type and size  
152 (Jędrzejewska et al. 2001). Coexistence of these two species is highly dependent on  
153 riparian habitat features and terrestrial prey availability, but dietary and spatial  
154 segregation of the otter and mink can eventually occur (Bonesi and Macdonald  
155 2004a, 2004b; Harrington et al. 2009). It is unknown whether this niche partitioning  
156 may exacerbate mink predation of native and threatened UK biodiversity.

157

158 We assessed the potential of DNA metabarcoding for investigating dietary profiles of  
159 the native otter and invasive mink, and resource overlap between these mustelids.  
160 Otter spraints and mink scats were collected at three study sites across northern and  
161 eastern England: Malham Tarn, a calcareous upland lake in North Yorkshire; River  
162 Glaven, a lowland chalk stream in North Norfolk; and the River Hull, a chalk stream  
163 in East Yorkshire. DNA extracted from faecal matter was analysed for all vertebrate  
164 species using high-throughput sequencing. We hypothesised low resource overlap  
165 between the otter and mink. The otter was expected to predate a broad range of  
166 aquatic and semi-aquatic prey (i.e. fish, amphibians, waterfowl) whereas the mink  
167 was anticipated to specialise on semi-aquatic and terrestrial species (i.e. birds,  
168 mammals) as documented by studies that used morphological faecal analysis.

169  
170

## 171 **Methods**

172

### 173 *Study sites and sample collection*

174

175 Mammal faeces were collected from 2015 to 2018 in northern and eastern England:  
176 River Hull catchment, East Yorkshire (sites along the river and ponds in close  
177 proximity to the river); Malham Tarn (lake) and Gordale Beck (stream close to  
178 Malham Tarn), West Yorkshire; and River Glaven catchment, Norfolk (sites along the  
179 river and ponds in close proximity) (Fig. S1). Sample information, including collection  
180 date, coordinates, and site, is provided in Table S1. Faeces were ostensibly  
181 identified as otter spraints ( $n = 206$ ), mink scats ( $n = 9$ ), and red fox (*Vulpes vulpes*)  
182 scat ( $n = 1$ ). The red fox scat was collected despite being a non-focal mammal  
183 predator due to potential predator misidentification using faecal characteristics.  
184 Faeces were collected using zip-lock bags or 50 mL falcon tubes (SARSTEDT,  
185 Germany, UK) and frozen at  $-20\text{ }^{\circ}\text{C}$  until DNA extraction. For each site, a basic  
186 inventory of fishes was created from available survey data to permit a broad  
187 comparison between prey detected in otter spraints by DNA metabarcoding and  
188 available prey species (Supplementary Material: Appendix 1). Fish survey (seine  
189 netting, electrofishing) data from 2000 to 2019 were extracted from the publicly  
190 available Environment Agency database (data.gov.uk) for the River Hull and River  
191 Glaven catchments. For the River Glaven, additional data were available from the  
192 surveys of Harwood et al. (2019) and Sayer et al. (in press). Fish community data for  
193 Malham Tarn were obtained through environmental DNA (eDNA) metabarcoding  
194 verified by fishery owners (Hänfling et al. 2020) and from fish surveys detailed in  
195 Eldridge (2016).

196

### 197 *DNA extraction*

198

199 DNA was extracted from faeces using the DNeasy PowerSoil Kit (Qiagen®, Hilden,  
200 Germany) or the Mu-DNA soil protocol with a tissue protocol wash stage (Sellers et  
201 al. 2018). Using a bleach and ultraviolet (UV) sterilised spatula and weigh boat  
202 (Merck, Darmstadt, Germany) for each sample,  $\approx 0.25\text{ g}$  of faecal matter was  
203 measured out and added directly to pre-labelled PowerBead tubes for DNeasy  
204 PowerSoil extraction or 5 mL tubes (Axygen™, Fisher Scientific, UK) containing 0.5  
205 g of 1-1.4 mm diameter sterile garnet beads (Key Abrasives Ltd., UK) for Mu-DNA  
206 extraction. Either 60  $\mu\text{L}$  of Solution C1 (DNeasy PowerSoil) or 550  $\mu\text{L}$  Lysis Solution  
207 and 200  $\mu\text{L}$  Soil Lysis Additive (Mu-DNA) was added to each tube. Tubes were



208 placed in a Qiagen® TissueLyser (30 frequencies/min) for 10 min to homogenise the  
209 samples. Remaining steps were performed according to the DNeasy PowerSoil or  
210 Mu-DNA protocol. Eluted DNA (100 µL) concentration was quantified on a Qubit™  
211 3.0 fluorometer using a Qubit™ dsDNA HS Assay Kit (Invitrogen, UK). DNA extracts  
212 were stored at -20 °C prior to PCR.

213

#### 214 *DNA metabarcoding*

215

216 Samples were processed for DNA metabarcoding in two libraries. One library  
217 contained the samples from the River Hull catchment, collected between 2015 and  
218 2017, while the other library contained samples from the River Hull, River Glaven  
219 and Malham Tarn collected in 2018. DNA metabarcoding followed the procedures  
220 established by Harper et al. (2019a) which are described in Supplementary Material:  
221 Appendix 2. Briefly, double-indexed libraries were constructed with a two-step PCR  
222 protocol which first used published primers 12S-V5-F (5'-  
223 ACTGGGATTAGATACCCC-3') and 12S-V5-R (5'-TAGAACAGGCTCCTCTAG-3')  
224 with modifications (i.e. indexes, heterogeneity spacers, sequencing primers, and pre-  
225 adapters) to amplify a region of the 12S ribosomal RNA (rRNA) mitochondrial gene  
226 (Riaz et al. 2011). These primers have been validated *in silico*, *in vitro*, and *in situ* for  
227 UK vertebrates (Hänfling et al. 2016; Harper et al. 2019a, 2019b). Exotic cichlid  
228 (*Maylandia zebra*) DNA (0.05 ng/µL) was the PCR positive control, and sterile  
229 molecular grade water (Fisher Scientific UK Ltd, Loughborough, UK) was the PCR  
230 negative control. Three PCR replicates were performed for each DNA sample and  
231 pooled prior to normalisation. Normalised sub-libraries were created by pooling PCR  
232 products according to band strength and PCR plate, and purified with Mag-BIND®  
233 RxnPure Plus magnetic beads (Omega Bio-tek Inc, GA, USA) following a double  
234 size selection protocol (Bronner et al. 2009). PCR in duplicate bound pre-adapters,  
235 indexes, and Illumina adapters to the purified sub-libraries, and PCR replicates were  
236 pooled for magnetic bead purification. Sub-libraries were quantified on a Qubit™ 3.0  
237 fluorometer using a Qubit™ dsDNA HS Assay Kit, and pooled proportional to sample  
238 size and concentration for magnetic bead purification. An Agilent 2200 TapeStation  
239 and High Sensitivity D1000 ScreenTape (Agilent Technologies, CA, USA) were used  
240 to verify fragment size (330 bp) of the final libraries and absence of secondary  
241 product. The libraries were quantified using real-time quantitative PCR with the  
242 NEBNext® Library Quant Kit for Illumina® (New England Biolabs® Inc., MA, USA) on  
243 a StepOnePlus™ Real-Time PCR system (Life Technologies, CA, USA) and diluted  
244 to 4 nM. Each library (one containing 125 faecal samples and eight PCR controls,  
245 and one containing 140 faecal samples, 12 PCR controls, and 12 external samples)  
246 was sequenced at 12 pM with 10% PhiX Control v3 on an Illumina MiSeq® using a  
247 MiSeq Reagent Kit v3 (600-cycle) (Illumina Inc., CA, USA). Raw sequence reads  
248 were demultiplexed with a custom Python script. Sequences underwent quality  
249 trimming, merging, chimera removal, clustering, and taxonomic assignment against  
250 our custom reference database for UK vertebrates (Harper et al. 2019b) using  
251 metaBEAT v0.97.11 (<https://github.com/HullUni-bioinformatics/metaBEAT>).  
252 Taxonomic assignment used a lowest common ancestor approach based on the top  
253 10% BLAST matches for any query that matched a reference sequence across  
254 >80% of its length at a minimum identity of 98%. Unassigned sequences were  
255 compared against the NCBI nucleotide (nt) database at 98% minimum identity using  
256 the same lowest common ancestor approach. The bioinformatic analysis has been

257 deposited in a dedicated GitHub repository, which has been permanently archived  
258 for reproducibility (<https://doi.org/10.5281/zenodo.4252552>)

259

## 260 *Data analysis*

261

262 Analyses were performed in the statistical programming environment R v.3.6.3 (R  
263 Core Team, 2020) unless otherwise stated. Data and R scripts have been deposited  
264 in the GitHub repository. Dataset refinement is summarised here and fully described  
265 in Supplementary Material: Appendix 2. BLAST results from different databases  
266 were combined and spurious assignments were removed. Where applicable, orders,  
267 families and genera containing a single UK species were reassigned to that species,  
268 species were reassigned to domestic subspecies, and misassignments were  
269 corrected. The read counts for metaBEAT and manual assignments were merged  
270 prior to application of a sequence threshold (i.e. maximum sequence frequency of  
271 cichlid DNA in faecal samples) to mitigate against contamination and false positives  
272 in the dataset (Figs S2, S3). After applying the false positive threshold (1.123%),  
273 taxonomic assignments above species-level were removed with exceptions  
274 (Supplementary Material: Appendix 2). Human (*Homo sapiens*) and domestic  
275 animals (cow [*Bos taurus*], dog [*Canis lupus familiaris*], pig [*Sus scrofa domesticus*])  
276 were regarded as environmental contaminants and also removed for the purposes of  
277 downstream analyses.

278

279 Using Microsoft Excel, each faecal sample was assigned to a mammal predator  
280 based on the proportional read counts for each predator species (otter, mink, red fox  
281 and European polecat [*Mustela putorius*]) detected (Supplementary Material:  
282 Appendix 3). In cases where DNA from multiple predators was present, the sample  
283 was assigned to the predator species which possessed more than 90% of the total  
284 predator read counts. If no predator species possessed more than 90% of the total  
285 predator read counts in a sample or a sample contained less than 100 reads for all  
286 predators, the sample was removed from the dataset. After predator assignment, the  
287 total percentage of prey (by vertebrate group) sequences relative to predator  
288 sequences was evaluated across all samples belonging to each predator in R (otter  
289 and mink) or Microsoft Excel (red fox and European polecat; Appendix 4). Using R,  
290 all predator reads, and samples belonging to red fox (hereafter fox) and European  
291 polecat (hereafter polecat), were then removed for downstream analyses.

292

293 In R, the data for otter and mink samples were summarised as the total percentage  
294 of prey sequences for each vertebrate group, proportional read counts for each prey  
295 taxon in each sample, and the percentage frequency of occurrence (i.e. the  
296 percentage of faecal samples that a prey taxon was detected in). The read count  
297 data were converted to presence/absence using the DECOSTAND function in the  
298 package vegan v2.5-6 (Oksanen et al. 2018). We used the package bipartite v2.15  
299 (Dormann et al. 2009) to construct a semi-quantitative trophic network for each  
300 predator and their prey. Network-level metrics were obtained using the  
301 NETWORKLEVEL function, and species-level metrics for each predator obtained  
302 using the SPECIESLEVEL function. Taxon richness (alpha diversity) was obtained  
303 using the SPECNUMBER function in the package vegan v2.5-6. Given that the data  
304 were not normally distributed (Shapiro-Wilk normality test:  $W = 0.921$ ,  $P < 0.001$ ) and  
305 the number of samples between predators and sampling locations was unbalanced,  
306 Kruskal-Wallis tests followed by Dunn's tests, from the packages stats v3.6.3 and

307 FSA v0.8.30 (Ogle et al., 2020) respectively, were used to compare alpha diversity of  
308 prey communities between otter and mink faecal samples, and between otter  
309 spraints from different sites. Data for the mink and each freshwater habitat were too  
310 sparse for examination of geographic variation in mink diet, and differences in otter  
311 and mink diet with regard to habitat (Fig. S4). We used the package iNEXT v2.0.20  
312 (Hsieh et al. 2016) to perform rarefaction and extrapolation curves to ensure that  
313 differences in prey taxon richness were not driven by imbalances in sample size for  
314 predators and sampling locations. The INEXT function was run using incidence  
315 frequencies for prey taxa with 300 samples, 60 knots, 1000 bootstraps, and 95%  
316 confidence intervals. The ESTIMATED function was used to perform both sample  
317 size-based and coverage-based comparisons between predators and sampling sites  
318 (otter only) with 95% confidence intervals and 95% sample coverage (coverage-  
319 based comparison only).

320  
321 Before partitioning beta diversity, we compared prey community dissimilarity inferred  
322 from occurrence (i.e. presence/absence) and relative read abundance (RRA; i.e.  
323 proportional read counts) data. Using the package vegan v2.5-6, the read count data  
324 were converted to presence/absence and proportional read count matrices using the  
325 DECOSTAND function. Jaccard and Bray-Curtis dissimilarity indices were computed  
326 for the presence/absence and proportional read counts matrices respectively using  
327 the VEGDIST function, and beta diversity was visualised using Non-metric  
328 Multidimensional Scaling (NMDS) with the METAMDS function. Two outlier samples  
329 containing one or two taxa were removed to improve visualisation of variation in otter  
330 and mink diet (LIB02-TL01 [mink] and LIB02-TL07 [otter]) and site variation in otter  
331 diet (LIB02-TL07 and LIB04-TL57), but patterns produced by occurrence and RRA  
332 data were comparable (Fig. S5). Given that our stringent false positive sequence  
333 threshold should have removed any minor prey items, secondary predation, and  
334 contaminants, we used occurrence data with Jaccard dissimilarity for beta diversity  
335 partitioning to mitigate potential taxon recovery bias (Deagle et al. 2018).

336  
337 We employed the package betapart v1.5.1 (Baselga and Orme 2012) to estimate  
338 total beta diversity, partitioned by turnover (i.e. community dissimilarity due to taxon  
339 replacement) and nestedness-resultant (i.e. community dissimilarity due to taxon  
340 subsets), with the BETA.MULTI (multiple-site dissimilarities) and BETA.PAIR  
341 (pairwise dissimilarity matrices) functions. For each component of beta diversity, we  
342 compared community heterogeneity in faecal samples grouped by predator (otter or  
343 mink) or site of otter spraint collection (Malham Tarn, River Glaven, River Hull) by  
344 calculating homogeneity of multivariate dispersions (MVDISP) using the  
345 BETADISPER function from the package vegan v2.5-6. Variation in MVDISP  
346 between otter and mink samples or between otter spraints from different sites was  
347 statistically tested using ANOVA. Differences in prey communities for each  
348 component of beta diversity were visualised using NMDS with the METAMDS  
349 function, and tested statistically using permutational multivariate analysis of variance  
350 (PERMANOVA) with the function ADONIS in the package vegan v2.5-6. Pre-defined  
351 cut-off values were used for effect size, where PERMANOVA results were  
352 interpreted as moderate and strong effects if  $R^2 > 0.09$  and  $R^2 > 0.25$  respectively.  
353 These values are broadly equivalent to correlation coefficients of  $r = 0.3$  and  $0.5$   
354 which represent moderate and strong effects accordingly (Nakagawa & Cuthill,  
355 2007). All figures were produced using the package ggplot2 v3.3.1 (Wickham, 2009),



356 except Fig. 4 which was produced in Microsoft PowerPoint. Legends for Figs 1, 2,  
357 and 3 were adjusted using Inkscape (<http://www.inkscape.org/>).

358  
359

## 360 **Results**

361

### 362 *Data filtering*

363

364 The libraries generated a total of 22,286,976 and 40,074,340 raw sequence reads  
365 respectively, which were reduced to 9,487,780 and 14,362,257 reads by trimming,  
366 merging, and length filter application. After removal of chimeras and redundancy via  
367 clustering, 9,340,695 and 14,153,929 reads remained (average read count of 72,408  
368 and 86,304 per sample including controls), of which 9,244,260 (98.97%) and  
369 13,909,558 (98.27%) were assigned a taxonomic rank. Contamination from different  
370 sources was observed in the PCR controls (Fig. S2) as well as cichlid DNA in the  
371 faecal samples. No cichlid DNA remained in the faecal samples after application of  
372 the false positive sequence threshold, and taxonomic assignments were narrowed  
373 (Fig. S3). Before threshold application, we detected 127 taxa from 216 faecal  
374 samples, including six amphibian taxa, 43 fish taxa, 36 bird taxa, and 41 mammal  
375 taxa. However, 61 taxa (including two amphibian taxa, 20 fish taxa, 17 bird taxa, and  
376 21 mammal taxa) were consistently detected below our threshold and were therefore  
377 removed from the dataset. The final dataset after threshold application and  
378 refinement of taxonomic assignments contained 46 taxa (38 assigned to species-  
379 level): three amphibians, 19 fishes, 13 birds, and 11 mammals.

380

### 381 *Predator assignment*

382

383 Thirteen faecal samples contained less than 100 reads for any mammal predator  
384 and were removed from the dataset. In most of the remaining samples, DNA from a  
385 single predator comprised 100% of the total predator read counts (otter:  $n = 169$ ;  
386 mink:  $n = 17$ ; fox:  $n = 5$ ; polecat:  $n = 1$ ). Four samples with read counts for multiple  
387 predator species were assigned to a predator species based on a majority rule, i.e.  
388 the predator species possessed >90% of the total predator read counts (otter:  $n = 2$ ;  
389 mink:  $n = 2$ ). Seven samples were discarded because a confident predator  
390 assignment could not be made, i.e. no predator possessed >90% of the total  
391 predator read counts. Consequently, the refined dataset contained 171 otter, 19  
392 mink, 5 fox, and 1 polecat faecal sample(s). For 90.82% of samples that were  
393 retained ( $n = 196$ ), predator assignment was in agreement with visual identification of  
394 faeces. Predator assignment in 18 samples (9.18%) changed based on DNA  
395 metabarcoding. Fox and polecat diet is reported in Supplementary Material:  
396 Appendix 5.

397

### 398 *Otter and mink diet*

399

400 Otter DNA and mink DNA encompassed 31.1% and 48.0% respectively of reads  
401 obtained from faecal samples belonging to these mustelids (Fig. 1). Using the prey  
402 reads, otter diet was mainly composed of fishes (81.0%) and amphibians (12.7%),  
403 whereas mink diet predominantly consisted of birds (55.9%) and mammals (39.6%)  
404 (Fig. 1).

405

406 The bipartite trophic network for the otter and mink contained 40 prey species (Fig.  
407 2), of which eight were predated by both mustelids: bream (*Abramis brama*),  
408 European bullhead (*Cottus gobio*), three-spined stickleback (*Gasterosteus*  
409 *aculeatus*), ducks (*Anas* spp.), Eurasian coot (*Fulica atra*), common moorhen  
410 (*Gallinula chloropus*), starling (*Sturnus vulgaris*), and water vole (*Arvicola amphibius*)  
411 (Figs 2, 3). Notably, occurrence of mink predation on bream (5.26%), duck species  
412 (10.53%), Eurasian coot (15.79%), common moorhen (5.26%), starling (15.79%),  
413 and water vole (15.79%) was more frequent than occurrence of otter predation on  
414 these species (2.92%, 5.85%, 1.75%, 4.09%, 0.59%, and 0.59% respectively) (Fig.  
415 3). Network-level metrics indicated some degree of specialisation (specialisation  
416 index  $H2' = 0.628$ ), with few prey interactions for each predator (generality = 14.333)  
417 and a low proportion of possible interactions realised in the network (weighted  
418 connectance = 0.184), leading to few shared prey species between otter and mink  
419 (niche overlap = 0.267).

420  
421 Species-level metrics for each predator provide further evidence for predator  
422 specialisation within the network. Both predators' diets were relatively specialised  
423 (Paired Differences Index: otter = 0.893, mink = 0.812), but mink diet showed greater  
424 divergence from random selections of prey species ( $d'$ : otter = 0.526, mink = 0.671),  
425 with a lower proportion of available resources utilised (proportional similarity: otter =  
426 0.962, mink = 0.209; unused resource range: otter = 0.128, mink = 0.692). However,  
427 resources within each predators' diet were used relatively evenly, with neither  
428 species relying predominantly on a few key resources (species specificity index: otter  
429 = 0.287, mink = 0.267). Shannon diversity of predator-prey interactions was higher  
430 for the otter than the mink (partner diversity: otter = 2.672, mink = 2.449), suggesting  
431 that mink diet was less diverse. Only 13 prey species were detected in mink scats  
432 compared with 35 prey species in otter spraints (Figs 2, 3).

433  
434 Prey species unique to the mink were brown hare (*Lepus europaeus*), *Microtus* spp.,  
435 water shrew (*Neomys fodiens*), European rabbit, and brown rat (*Rattus norvegicus*),  
436 but many fishes and amphibians were unique to the otter (Figs 2, 3, S6). Otter  
437 predation events largely involved common frog (*Rana temporaria*) and small,  
438 abundant fishes, such as European bullhead, stone loach (*Barbatula barbatula*),  
439 three-spined stickleback, and ninespine stickleback (*Pungitius pungitius*), with  
440 predation on medium (e.g. crucian carp [*Carassius carassius*], roach [*Rutilus rutilus*],  
441 Percidae spp.) and large (e.g. European eel [*Anguilla anguilla*], Northern pike [*Esox*  
442 *lucius*]) fishes occurring less frequently (Figs 3, S6). At each site, all fishes detected  
443 by DNA metabarcoding of otter spraints had also been recorded during recent  
444 surveys (conducted between 2000 and 2019) that used conventional fish monitoring  
445 tools or eDNA metabarcoding (Fig. 4). However, some fishes detected during  
446 previous surveys of the River Glaven ( $n = 9$ ), River Hull ( $n = 8$ ), and Malham Tarn ( $n$   
447 = 1) were not found with faecal DNA metabarcoding (Fig. 4).

448  
449 Two otter and two mink samples did not contain any prey taxa and were removed  
450 from the dataset for alpha and beta diversity analyses. Predator influenced alpha  
451 diversity of faecal samples ( $\chi^2_1 = 22.786$ ,  $p < 0.001$ ), with taxon richness of mink  
452 scats significantly lower ( $Z = -4.773$ ,  $p < 0.001$ ) than that of otter spraints (Fig. 5a).  
453 Rarefaction and extrapolation curves indicated that lower prey taxon richness of  
454 mink scats was not due to disparities in sample size between predators. Prey taxon  
455 richness began to plateau at 21 taxa with 95 or more mink scats. In contrast, prey

456 taxon richness did not plateau even with 300 otter spraints, at which 42 taxa would  
457 be detected (Fig. 5bi). Over 1100 otter spraints would be required for prey taxon  
458 richness to begin to plateau at 51 taxa. With our present sample size, we achieved  
459 98.1% and 76.9% sample coverage for the otter and mink respectively (Fig. 5bii). To  
460 achieve 95% sample coverage for the mink, we would need an additional 37 mink  
461 scats (54 total). Despite the disparities in sample size, it is unlikely that the mink  
462 would consume more prey taxa than the otter (Fig. 5biii).

463  
464 Beta diversity of both otter and mink faecal samples was largely driven by turnover  
465 (otter: 99.51%; mink: 98.90%) as opposed to nestedness-resultant (otter: 0.49%;  
466 mink: 1.10%). MVDISP was different between predators for turnover and total beta  
467 diversity, where mink scats had significantly higher dispersion than otter spraints, but  
468 not nestedness-resultant (Table 1). Predator had a weak positive influence on the  
469 turnover (Fig. 5ci) and total beta diversity (Fig. 5ciii) of prey communities, but not  
470 nestedness-resultant (Fig. 5cii; Table 1). Therefore, prey items consumed by the  
471 otter were fundamentally different taxa to prey items consumed by the mink,  
472 resulting in dissimilar prey community composition.

#### 473 474 *Geographic variation in otter diet*

475  
476 Of 171 otter spraints, 25 came from Malham Tarn, 38 came from the River Glaven,  
477 and 125 came from the River Hull. Two samples (1 each from Malham Tarn and the  
478 River Glaven) were removed from the dataset for alpha and beta diversity analyses  
479 as they did not contain any prey taxa. Site influenced alpha diversity of otter spraints  
480 ( $\chi^2_2 = 21.876$ ,  $p < 0.001$ ), where otter spraints from Malham Tarn ( $Z = -3.029$ ,  
481 adjusted  $p$  [Benjamini-Hochberg] = 0.004) and the River Glaven ( $Z = -4.116$ ,  
482 adjusted  $p$  [Benjamini-Hochberg] < 0.001) exhibited lower taxon richness than  
483 spraints from the River Hull. Taxon richness in otter spraints from Malham Tarn and  
484 the River Glaven did not significantly differ ( $Z = 0.439$ , adjusted  $p$  [Benjamini-  
485 Hochberg] = 0.661) (Fig. 6a).

486  
487 Rarefaction and extrapolation curves indicated that lower prey taxon richness of  
488 Malham Tarn and River Glaven otter spraints was not due to disparities in sample  
489 size between sites. Prey taxon richness began to plateau at 10 and 19 taxa with 54  
490 and 107 otter spraints from Malham Tarn and the River Glaven respectively. In  
491 contrast, prey taxon richness did not plateau for the River Hull even with 300 otter  
492 spraints, at which 38 taxa would be detected (Fig. 6bi). Over 1100 otter spraints from  
493 the River Hull would be required for prey taxon richness to begin to plateau at 44  
494 taxa. With our present sample size, we achieved 95.2%, 94.5%, and 98.3% sample  
495 coverage for Malham Tarn, the River Glaven, and the River Hull respectively (Fig.  
496 6bii). To achieve 95% sample coverage for the River Glaven, we would need an  
497 additional two otter spraints (39 total). Despite the disparities in sample size, it is  
498 unlikely that the otter would consume more prey taxa at Malham Tarn or the River  
499 Glaven than the River Hull (Fig. 6biii).

500  
501 Beta diversity of otter samples from all sites was largely driven by turnover (Malham  
502 Tarn: 86.91%; River Glaven: 98.41%; River Hull: 99.24%) as opposed to  
503 nestedness-resultant (Malham Tarn: 13.09%; River Glaven: 1.59%; River Hull:  
504 0.76%). MVDISP was different between sites for turnover, nestedness-resultant, and  
505 total beta diversity, where samples from the River Glaven and River Hull had greater

506 dispersion than samples from Malham Tarn (Table 2). Site had a moderate positive  
507 influence on turnover (Fig. 6ci) and weak positive influence on total beta diversity  
508 (Fig. 6ciii) of prey communities, but not nestedness-resultant (Fig. 6cii; Table 2).  
509 Therefore, prey taxa consumed by otters at a given site were replaced by different  
510 prey taxa at other sites.

511

512

## 513 Discussion

514

515 We have demonstrated that DNA metabarcoding of otter and mink faeces using  
516 vertebrate-specific primers is suitable for dietary assessment, and could be applied  
517 to other vertebrate carnivores. We identified a wide range of fish, amphibians, birds,  
518 and mammals, all of which were plausible prey items of the otter and mink due to  
519 previous species records from each study site. Incorporation of this molecular tool  
520 into future dietary assessments for the native otter and invasive mink will enhance  
521 our understanding of niche separation between these mustelids.

522

### 523 *Predator assignment*

524

525 In our study, nearly 10% of scats were misidentified visually and corrected based on  
526 predator reads from DNA metabarcoding. Thirteen mink, four fox, and one polecat  
527 sample(s) were misidentified as otter spraints. Although collector experience likely  
528 influenced this error rate, collectors had received training and most had substantial  
529 experience of scat collection for otter diet studies. Similarly, Harrington et al. (2010)  
530 found that 75 scats identified as mink by experienced field surveyors actually  
531 belonged to pine marten (*Martes martes*), fox, otter, polecat, or stoat (*Mustela*  
532 *erminea*) using DNA barcoding. Scat misidentification can lead to inclusion of prey  
533 species consumed by non-focal predators and omission of prey species consumed  
534 by the focal predator(s) in dietary assessments, which could have detrimental  
535 implications for species conservation and/or management (Martínez-Gutiérrez et al.  
536 2015; Akrim et al. 2018). Therefore, DNA barcoding (Davison et al. 2002; Harrington  
537 et al. 2010; Shehzad et al. 2012a, 2012b; Akrim et al. 2018) or DNA metabarcoding  
538 (Berry et al. 2017; Forin-Wiart et al. 2018) should be used to identify scats where  
539 possible.

540

541 Presence of predator DNA is double-edged and can also complicate DNA  
542 metabarcoding. Scats from mammalian carnivores can include intact DNA from hairs  
543 ingested during grooming (Carss and Parkinson 1996; Shehzad et al. 2012a; Reid et  
544 al. 2013) and from intestinal mucosa cells of the defecating predator (Oehm et al.  
545 2011). This can lead to faecal samples being swamped by predator DNA and  
546 masking of degraded prey DNA, resulting in reduced detection probability (Shehzad  
547 et al. 2012b; Piñol et al. 2015; Robeson et al. 2018; Forin-Wiart et al. 2018; Traugott  
548 et al. 2020). This issue can sometimes be alleviated by adding consumer-specific  
549 blocking primers (Shehzad et al. 2012a, 2012b; De Barba et al. 2014; Robeson et al.  
550 2018), but potential drawbacks include coblocking of closely related prey taxa, an  
551 increased number of sequencing artefacts, and alteration of compositional dietary  
552 profiles (Shehzad et al. 2012b; Piñol et al. 2014, 2015; McInnes et al. 2016;  
553 Robeson et al. 2018). In our study, otter and mink DNA was present in faecal  
554 samples at moderate frequencies (31% and 48% of reads respectively), but did not  
555 swamp prey DNA pools acquired for these predators. Higher frequencies of predator



556 DNA were observed in the few fox and polecat samples, but samples still contained  
557 a sufficient number of prey reads for reliable identification. Balanced prey and  
558 predator DNA in faecal samples is a prerequisite for high detection probability of prey  
559 species as well as reliable predator identification, and raises the possibility of using  
560 faecal DNA for genotyping individual predators (Bayerl et al. 2017).

561

#### 562 *Otter diet*

563

564 Our finding that otter diet mainly consisted of fish (81.1%), followed by amphibians  
565 (12.7%), birds (5.9%) and mammals (0.5%) is consistent with the results of  
566 morphological analyses that visually identified prey remains in spraints or stomachs  
567 (Jędrzejewska et al. 2001; Clavero et al. 2003; Britton et al. 2006; Reid et al. 2013;  
568 Krawczyk et al. 2016; Lanszki et al. 2016). For example, in comparable habitats of  
569 the Pannonian biogeographical region, Lanszki et al. (2016) found similar relative  
570 occurrence frequencies of fish (82.9%), amphibians (5.1%), reptiles (0.6%), birds  
571 (6.7%), mammals (1.0%), crayfish (1.4%), and other invertebrates (2.3%) in otter  
572 spraints from rivers, and fish (81.6%), amphibians (7.7%), reptiles (0.8%), birds  
573 (2.6%), mammals (1.3%), crayfish (0.4%) and other invertebrates (5.8%) in otter  
574 spraints from ponds using morphological analysis. Overall, our results indicate that  
575 there was a significant difference in prey community composition of otter spraints at  
576 species-level across sites, suggesting that otter diet is highly situational and  
577 determined by local variation in prey availability. This is consistent with the wide  
578 variety of dietary profiles for the otter reported by previous morphological studies  
579 (Ruiz-Olmo et al. 2001; Britton et al. 2006, 2017; Remonti et al. 2010; Reid et al.  
580 2013; Krawczyk et al. 2016; Lanszki et al. 2016). Our results are also in agreement  
581 with faecal DNA metabarcoding studies of otter diet. Both Buglione et al. (2020) and  
582 Martínez-Abraín et al. (2020) found fish were the primary food resource for otters,  
583 followed by amphibians. Specifically, Cyprinidae, Gobidae, Salmonidae, and  
584 Percidae were the predominant prey taxa.

585

586 Otter diet and fish assemblages in the River Glaven catchment have been  
587 extensively studied (Zambrano et al. 2006; Sayer et al. 2011; Almeida et al. 2012,  
588 2013; Champkin et al. 2017). Non-fish species found using morphological spraint  
589 analysis included common frog, common toad, grass snake, common moorhen,  
590 Eurasian coot, little grebe (*Tachybaptus ruficollis*), mallard (*Anas platyrhynchos*), and  
591 water vole (Almeida et al. 2012, 2013). We found that DNA metabarcoding detected  
592 all of these species from at least one study site, except for grass snake and little  
593 grebe. Several fishes were previously detected by morphological spraint analysis or  
594 fish surveys but not by DNA metabarcoding, including stone loach, gudgeon (*Gobio*  
595 *gobio*), ninespine stickleback, ruffe (*Gymnocephalus cernua*), *Lampetra* spp.,  
596 European flounder (*Platichthys flesus*), rudd (*Scardinius erythrophthalmus*), common  
597 bream, goldfish (*Carassius auratus*) and common carp (*Cyprinus carpio*). The  
598 common carp and ruffe were initially detected by DNA metabarcoding in agreement  
599 with previous morphological studies (Zambrano et al. 2006; Sayer et al. 2011;  
600 Almeida et al. 2012; Sayer et al. 2020), but removed by our false positive sequence  
601 threshold. Other fishes, while not detected in the River Glaven spraints, were  
602 nonetheless detected in spraints from the River Hull or Malham Tarn. The common  
603 bream may not have been detected by DNA metabarcoding as this species was last  
604 recorded in 1999 by fish surveys at low abundance in one lake (Zambrano et al.  
605 2006). Nondetections of common species in the River Glaven, such as stone loach

606 and brook lamprey (*Lampetra planeri*), may be due to technical bias that can occur  
607 throughout the DNA metabarcoding workflow (see *Considerations for molecular*  
608 *scatology*).

609  
610 Range expansion of the otter into Malham Tarn occurred recently in 2009, and only  
611 two individuals have established themselves at the site thus far. Non-fish species  
612 found using morphological spraint analysis included common frog, common toad,  
613 mallard, tufted duck (*Aythya fuligula*), gull (Laridae spp.), pheasant (*Phasianus*  
614 *colchicus*), and rook (*Corvus frugilegus*) (Alderton et al. 2015). Using DNA  
615 metabarcoding, we detected common frog, *Anas* spp., and Laridae spp. in Malham  
616 Tarn spraints, and common toad and *Aythya* spp. in River Hull spraints. Fishes  
617 detected using morphological spraint analysis or fish surveys included European  
618 bullhead, brown trout (*Salmo trutta*), stone loach, perch, and three-spined  
619 stickleback. Only brown trout was not detected by DNA metabarcoding at this study  
620 site. Large brown trout tend to be open-water feeders in Malham Tarn, whereas  
621 juvenile trout reside in the inflow and outflow streams (Eldridge 2016). Absence of  
622 brown trout in spraints may reflect a low preference for feeding in open water areas  
623 due to the high energy expenditure required to hunt in these habitats in this relatively  
624 large lake (Lanszki et al. 2001). In contrast, the European bullhead and stone loach  
625 are associated with shoreline cobble-boulder habitats at Malham Tarn, as are small  
626 perch (Eldridge 2016). Therefore, habitat associations may explain detection and  
627 nondetection of fishes in otter spraints (Lanszki et al. 2001; Alderton et al. 2015).

628  
629 To our knowledge, no information on otter diet in the River Hull catchment has been  
630 published, although research is ongoing (Hänfling et al. unpublished data). Otter diet  
631 was most diverse at this site compared to the River Glaven and Malham Tarn,  
632 reflecting the higher fish diversity present in this river system. Previous fish surveys  
633 of the River Hull using electrofishing or eDNA metabarcoding recorded the same  
634 species identified by DNA metabarcoding of otter spraints, except common dace  
635 (*Leuciscus leuciscus*), common barbel (*Barbus barbus*), common carp, European  
636 chub (*Squalius cephalus*), and tench (*Tinca tinca*). Common carp, common barbel,  
637 and European chub were all detected in otter spraints prior to false positive threshold  
638 application, but common dace and tench went undetected.

639  
640 Notwithstanding nondetections at each site, DNA metabarcoding identified species  
641 at higher taxonomic resolution than morphological analysis can provide or which  
642 morphological identification may miss entirely. Sequences were assigned to common  
643 frog and common toad with DNA metabarcoding, whereas amphibian remains are  
644 rarely identified to species-level with morphological spraint analysis (Smiroldo et al.  
645 2019). Bird and small mammal remains are typically unidentifiable, or at least  
646 challenging to identify, with morphological analysis (Britton et al. 2006; Alderton et al.  
647 2015), yet DNA metabarcoding recorded water vole, common waterfowl (*Anas* spp.,  
648 *Aythya* spp., Eurasian coot, common moorhen), waders (*Tringa* spp.), gulls (Laridae  
649 spp.), and cormorant (*Phalacrocorax carbo*) as well as a number of terrestrial birds,  
650 including starling, red-legged partridge (*Alectoris rufa*), stock dove (*Columba oenas*),  
651 Eurasian jay (*Garrulus glandarius*), and pheasant. Species-level identification based  
652 on morphology is often achievable for smaller fishes (e.g. stickleback species,  
653 European bullhead) as otters consume the entire fish resulting in presence of bones  
654 in spraints. However, otters only consume selected pieces of flesh and internal  
655 organs from larger fishes (e.g. cyprinids, salmonids) and frequently abandon the

656 remainder as an unfinished meal (Almeida et al. 2013). Low occurrence of hard prey  
657 components from larger fish in otter spraints may prevent morphological  
658 identification, especially of closely related cyprinids (e.g. common carp, goldfish,  
659 crucian carp, and their hybrids) which have similar scales. This does not pose an  
660 issue for DNA metabarcoding so detection may be improved with molecular  
661 scatology.

662  
663 Despite the regional differences in otter diet, some common dietary patterns  
664 emerged. The otter has been reported to selectively predate slow-moving and  
665 smaller prey (Chanin 1981; Martínez-Abraín et al. 2019, 2020), with diet reflecting  
666 both species and size composition of fish communities occupying their territory.  
667 Consistent with previous morphological studies of the River Glaven and Malham  
668 Tarn (Almeida et al. 2012; Alderton et al. 2015), we found that otters primarily  
669 consumed slow-moving, small species, with less frequent predation on larger  
670 species. The European bullhead was the most commonly consumed species at all  
671 three study sites. This small benthic species tends to utilise camouflage over escape  
672 movements, and it is clear that this strategy may not be effective for avoiding capture  
673 by the otter. Additionally, it is possible that the otter has developed unique capture  
674 behaviour with regards to European bullhead. Malham Tarn observational work  
675 indicated that otters exhibited vigorous rolling and thrashing behaviours in shallow  
676 rocky water, presumably to reveal European bullhead presence when hidden  
677 amongst cobble-boulder structures (Alderton et al., 2015). Other small, littoral, and  
678 benthic species with similar characteristics, such as three-spined stickleback,  
679 ninespine stickleback, and stone loach, were also among the most frequently  
680 consumed species. Capture of these species might require very little energy  
681 expenditure by the otter, even relative to their size, whereas larger, faster fish  
682 provide more energy but require more energy to catch and a longer handling time  
683 (Remonti et al. 2010; Martínez-Abraín et al. 2019). Therefore, smaller fishes that can  
684 be consumed whole are often preferred, although habitat conditions and fish  
685 abundance also play a role (Ruiz-Olmo et al. 2001; Britton et al. 2006, 2017;  
686 Remonti et al. 2010; Krawczyk et al. 2016; Lanszki et al. 2016; Martínez-Abraín et al.  
687 2019). European bullhead and stickleback species are common at all three of our  
688 study sites (Sayer et al. 2011, 2020; Almeida et al. 2012, 2013; Alderton et al. 2015;  
689 Champkin et al. 2017; Harwood et al. 2019; Hänfling et al. unpublished data), thus  
690 their frequent occurrence in spraints may simply reflect their high abundance in the  
691 environment.

692  
693 Some medium-sized species were also consumed frequently where they were  
694 common, such as the European perch in the River Hull catchment and Malham Tarn,  
695 and the crucian carp in the River Glaven catchment, a frequent species in farmland  
696 ponds (Sayer et al. 2011, 2020). Conversely, other medium-sized or large species  
697 which are abundant at our study sites, such as brown trout, common dace, roach  
698 and European eel, seemed to be underrepresented in spraints. The fish size  
699 categories used here are based on average adult sizes and therefore may not fully  
700 explain underrepresentation of these species. Most of these species (apart from  
701 European eel) are fast-swimming, open water species, even as juveniles. As such,  
702 their capture might require more energy than that of benthic and littoral species.  
703 Molecular data cannot reveal the size of individual fish consumed, but morphological  
704 spraint analysis has repeatedly shown that small-sized individuals are preferred. For  
705 example, a study in South West England showed that European eels of 180 to 270

706 mm and cyprinids and salmonids of 40 to 130 mm were preferred over larger  
707 specimens (up to 440 mm) (Britton et al. 2006). Yet, otters preferred fish weighing  
708 between 500-1000 g in a fish pond and streams in the Lake Balaton catchment in  
709 Hungary (Lanszki et al. 2001). More detailed quantitative data on fish abundance in  
710 the environment are required to distinguish prey selection from density-dependent  
711 predation. Indeed, small and benthic species are often underreported in conventional  
712 fish surveys, but recent eDNA metabarcoding studies have shown that these species  
713 might be much more abundant than previously thought (Hänfling et al. 2016; Li et al.  
714 2019; Griffiths et al. 2020).

715  
716 Amphibians are an important secondary food resource for otters, comprising up to  
717 43% (average 12%) of otter diet in a meta-analysis of 64 morphological studies  
718 conducted across Europe (Smiroldo et al. 2019). Seasonal peaks in otter predation  
719 of amphibians tend to coincide with amphibian reproduction in spring and reduced  
720 fish availability in winter (Sidorovich 2000; Lanszki et al. 2001; Britton et al. 2006;  
721 Prigioni et al. 2006; Reid et al. 2013; Almeida et al. 2013; Alderton et al. 2015;  
722 Smiroldo et al. 2019). In our study, occurrence frequency of amphibians in otter diet  
723 was on par with previous estimates, particularly common frog and common toad  
724 (Jędrzejewska et al. 2001; Clavero et al. 2003; Smiroldo et al. 2019). This was likely  
725 due to a high abundance of anurans in ponds next to the River Glaven, River Hull,  
726 and Malham Tarn. We also found evidence of predation on great crested newt  
727 (*Triturus cristatus*), but detections were negated by our stringent false positive  
728 threshold. We did not find any reptiles, but otter predation of grass snake (*Natrix*  
729 *natrix*) in the River Glaven catchment has been recorded by morphological spraint  
730 analysis (Almeida et al. 2012). Our study reaffirmed that birds and mammals are of  
731 tertiary importance to the otter and these predation events are probably opportunistic  
732 (Chanin 1981; Lanszki et al. 2001; Jędrzejewska et al. 2001; Clavero et al. 2003;  
733 Prigioni et al. 2006; Krawczyk et al. 2016).

#### 734 735 *Mink diet*

736  
737 Published diet assessments for the mink are modest in comparison to the otter. In  
738 our study, mink diet was dominated by birds (55.9%) and mammals (39.6%) with  
739 only a small component of fish (4.5%). A morphological study in the Biebrza  
740 Wetlands of Poland also observed that more mammals (43.7%), fish (32.9%) and  
741 birds (21.5%) than amphibians (1.9%) and invertebrates (0.1%) were consumed by  
742 the mink in a harsh winter, yet the importance of mammals (68.8%), amphibians  
743 (27.2%), birds (1.2%), fish (2.7%) and invertebrates (0.1%) shifted in a mild winter  
744 (Skierczyński and Wiśniewska 2010). These results and our own somewhat contrast  
745 with other estimates obtained using morphological analyses. Across the Palaearctic  
746 region, the mink on average consumed mostly fish (31.9%) and small mammals  
747 (25.4%), supplemented by birds (16.2%), amphibians (11.9%), crustaceans (11.0%),  
748 and other invertebrates (2.9%) (Jędrzejewska et al. 2001), but consumption varies  
749 with location. For example, in woodland streams and rivers of Poland, mink diet was  
750 dominated by fish (spring-summer: 40%; autumn-winter: 10%), amphibians (spring-  
751 summer: 32%; autumn-winter: 51%), and mammals (spring-summer: 21%; autumn-  
752 winter: 36%) (Jędrzejewska et al. 2001). In the Lovat River of Belarus, mink diet was  
753 composed of amphibians (ranging from 14-72%, mean 37%) and small mammals (4-  
754 80%, mean 27%), supplemented by fish and crayfish (Sidorovich 2000). Despite  
755 these overall differences in mink diet, individual prey items found in morphological



756 studies were also identified here, including three-spined stickleback, duck species,  
757 Eurasian coot, common moorhen, starling, bank vole, water shrew, brown rat, and  
758 European rabbit (Chanin 1981; Jędrzejewska et al. 2001; Bonesi et al. 2004; Bonesi  
759 and Macdonald 2004b; Melero et al. 2008; Harrington et al. 2009). Importantly, we  
760 also identified water vole in mink scats which is an endangered species in the UK  
761 (Mathews and Harrower 2020).

762

763 The molecular assay used here does not target invertebrates, but previous  
764 morphological studies have shown that these taxa, especially crayfish, can constitute  
765 a substantial proportion of otter (average 11.2%) and mink (average 13.9%) diet  
766 depending on the biogeographical region studied (Jędrzejewska et al. 2001; Lanszki  
767 et al. 2016). For example, the native white-clawed crayfish (*Austropotamobius*  
768 *pallipes*) and invasive signal crayfish (*Pacifastacus leniusculus*) occurred at a  
769 frequency of 8.7-25% in otter spraints from the River Glaven catchment (Almeida et  
770 al. 2012). The otter and mink may consume more arthropods and molluscs, which  
771 are of low energetic value, when fish composition and abundance changes (Clavero  
772 et al. 2003; Bonesi et al. 2004). Typical prey species include *Gammarus pulex*,  
773 *Asellus aquaticus*, *Dytiscus* spp., white-clawed crayfish, signal crayfish, and the  
774 invasive red swamp crayfish (*Procambarus clarkii*) (Carss and Parkinson 1996;  
775 Lanszki et al. 2001; Jędrzejewska et al. 2001; Britton et al. 2006; Melero et al. 2008;  
776 Almeida et al. 2012, 2013; Reid et al. 2013; Alderton et al. 2015; Martínez-Abraín et  
777 al. 2020), but smaller invertebrates could be instances of secondary predation.  
778 Future diet assessments for the otter and mink using DNA metabarcoding should  
779 also target invertebrates and investigate their role in niche partitioning between these  
780 mustelids.

781

#### 782 *Niche partitioning between the otter and mink*

783

784 Our network analysis indicated that the otter used more available resources than the  
785 mink and mink diet was less diverse. This is consistent with many other  
786 morphological studies which conclude that the otter is a generalist (Prigioni et al.  
787 2006; Remonti et al. 2010) or an opportunist whose diet varies with prey availability  
788 and latitude (Clavero et al. 2003; Almeida et al. 2012, 2013; Reid et al. 2013;  
789 Alderton et al. 2015), although it has also been called a specialist with respect to diet  
790 being limited to aquatic prey such as fish and amphibians (Sidorovich 2000; Bonesi  
791 et al. 2004; Bonesi and Macdonald 2004b; Melero et al. 2008; Skierczyński and  
792 Wiśniewska 2010; Krawczyk et al. 2016). Conversely, the mink has been observed  
793 to utilise both aquatic and terrestrial resources (Sidorovich 2000; Jędrzejewska et al.  
794 2001; Bonesi et al. 2004; Bonesi and Macdonald 2004b; McDonald et al. 2007;  
795 Brzeziński et al. 2008; Melero et al. 2008; Skierczyński and Wiśniewska 2010).  
796 Results from previous morphological studies (Harrington et al. 2009) and presented  
797 here suggest that the mink specialises on terrestrial prey when coexisting with the  
798 otter.

799

800 With the caveat of a small sample size, we found low niche overlap (0.267) between  
801 the otter and mink in our study, which may be indicative of interspecific competition.  
802 Mink have been found to consume less fish and more birds and mammals in areas  
803 where otters were present, while the otter predominantly consumed fish and  
804 amphibians (Chanin 1981; Jędrzejewska et al. 2001; Bonesi et al. 2004; Melero et al.  
805 2008; Harrington et al. 2009). High niche overlap between the mink and otter was

806 found in Poland (Jędrzejewska et al. 2001) and Belarus (Sidorovich 2000), whereas  
807 low niche overlap was observed in North East Spain (Melero et al. 2008) using  
808 morphological analysis. Niche overlap may vary by geographic region and with  
809 predator density, prey composition, season, and environmental conditions (e.g.  
810 habitat, weather). In Belarus, higher niche overlap was identified in spring and  
811 autumn than summer or winter due to greater availability and consumption of  
812 amphibians by both the otter and mink (Sidorovich 2000). In Poland, higher niche  
813 overlap was found in spring-summer than autumn-winter (Jędrzejewska et al. 2001),  
814 in harsh winter conditions as opposed to mild winter conditions, and in a wetland  
815 complex compared to a river catchment (Skierczyński and Wiśniewska 2010). In the  
816 UK, Bonesi et al. (2004) found niche overlap between the otter and mink decreased  
817 following an increase in otter density and establishment of a resident population, and  
818 niche overlap was lower in winter than spring possibly due to resource restrictions.  
819 The majority of faecal samples in our study were collected in spring 2015 and  
820 autumn 2018, and our results suggest that niche partitioning between the otter and  
821 mink may occur year-round.

822  
823 Importantly, our study was of small geographic extent and analysed few mink scats  
824 relative to otter spraints. Across the UK, the native otter is recovering and the subject  
825 of ongoing conservation efforts, whereas the invasive mink has declined due to  
826 eradication programmes, ongoing control measures, and interspecific aggression  
827 from the otter. Therefore, otter spraints are much more abundant and easily sampled  
828 than mink scats. Upscaled investigations of otter and mink faeces collected from  
829 different freshwater habitats across all seasons are needed to improve  
830 understanding of resource use and niche overlap in these mustelids. Despite these  
831 limitations, our findings combined with those of previous morphological studies  
832 indicate that niche partitioning, through dietary and spatial segregation, between the  
833 otter and mink is probable in areas where these mustelids are sympatric and there is  
834 an abundance of aquatic and terrestrial resources (Chanin 1981; Bonesi et al. 2004;  
835 Bonesi and Macdonald 2004b; Brzeziński et al. 2008; Melero et al. 2008; Harrington  
836 et al. 2009). Evidently, the otter and mink can coexist, thus natural biological control  
837 of the invasive mink by the native otter will be insufficient on its own to reduce  
838 populations of the former. Continued deployment of artificial control methods will be  
839 required to eradicate the mink, but biological control can aid these efforts and  
840 promote conservation of species impacted by mink activity (Bonesi and Macdonald  
841 2004a, 2004b; Melero et al. 2008; Harrington et al. 2009).

#### 842 843 *Considerations for faecal DNA metabarcoding*

844  
845 Bias stemming from choices made throughout the DNA metabarcoding workflow can  
846 produce false positive and false negative detections. Scats collected in the field may  
847 originate from relatively few individuals, and samples may not be independent (Carss  
848 and Parkinson 1996). In the context of our study, male otters have relatively large  
849 home ranges (up to 40 km along the length of a river) and return to the same feeding  
850 sites (Kruuk 2006). Many of the otter spraints collected from the River Hull  
851 catchment may originate from the same territorial male (known from photographs  
852 taken by wildlife enthusiasts and trail cameras along the River Hull) that has been  
853 present for the last 10 years. Therefore, future DNA metabarcoding studies should  
854 include genotyping (Bayerl et al. 2017) and sex-specific markers (Schwarz et al.  
855 2018) to obtain information on identity and sex of predators. This will avoid

856 pseudoreplication (Carss and Parkinson 1996) and provide insights into individual  
857 and intersexual variation in diet (Schwarz et al. 2018). Concerning otters, this will  
858 also provide information on the communicatory role of sprainting (Kean et al. 2015).

859  
860 After deposition, scats may be exposed to abiotic and biotic factors that can  
861 influence their integrity as well as prey DNA degradation, including temperature (i.e.  
862 heat and dehydration), rainfall, UV exposure, coprophagous insects, microbial  
863 activity, and decomposition (Carss and Parkinson 1996; Davison et al. 2002; King et  
864 al. 2008; Harrington et al. 2010; Oehm et al. 2011; McInnes et al. 2016). Scats may  
865 remain in the environment for days or weeks before collection, thus scat freshness is  
866 key (Davison et al. 2002; King et al. 2008; De Barba et al. 2014; McInnes et al.  
867 2016). Scats should ideally be collected when an animal is observed defecating, but  
868 proxies for freshness include moisture, odour, colour, and consistency (King et al.  
869 2008; McInnes et al. 2016). Scats deposited on vegetation and soil were also found  
870 to have lower prey diversity than those deposited on rock or plastic, which may be  
871 related to inhibitory compounds present and microbial activity in soil or non-target  
872 DNA, e.g. plants, fungi (Oehm et al. 2011; McInnes et al. 2016). In our study, 13  
873 faecal samples (12 otter and one mink according to field identification) failed to  
874 produce enough reads for predator assignment and dietary analyses, and another  
875 four (two otter, two mink) did not contain any prey taxa. This may be related to  
876 freshness or substrate, or these samples may have been deposited by individuals  
877 that were fasting due to territorial defence, prey availability, dispersal, pregnancy,  
878 rearing young, or limited mobility (McInnes et al. 2016). Future investigations should  
879 assess the influence of scat freshness, substrate, and fasting in the otter and mink  
880 on prey detection.

881  
882 Back in the laboratory, DNA extraction may influence prey detection probabilities,  
883 including sample coverage, the protocol used (e.g. commercial vs. modular,  
884 designed for faeces vs. other substrates) and its efficiency (King et al. 2008;  
885 Harrington et al. 2010; Oehm et al. 2011). Prey DNA can be non-uniform in predator  
886 faecal samples, thus it may be necessary to subsample or homogenise faeces for  
887 DNA extraction (Gosselin et al. 2016) to prevent failed samples. Mustelid scats also  
888 contain a number of volatile organic compounds that can be problematic for DNA  
889 extraction and PCR (Sellers et al. 2018; Traugott et al. 2020). Both the Qiagen®  
890 DNeasy PowerSoil Kit and Mu-DNA soil protocols used here were demonstrated to  
891 produce high purity DNA yields from otter spraints suitable for PCR amplification  
892 (Sellers et al. 2018). However, we cannot rule out the possibility of DNA degradation  
893 or co-extraction of humic substances, phenolic compounds, and proteins in the 13  
894 failed samples. Quality and quantity of prey DNA may be further enhanced by  
895 performing extraction replicates for each sample and passing the lysate for each  
896 through one spin column or sequencing each independently (King et al. 2008).  
897 Extraction, PCR, and sequencing replication also allows occupancy modelling to  
898 identify potential false positives arising from secondary predation or contamination  
899 and to estimate species detection probabilities (Ficetola et al. 2015).

900  
901 Secondary predation has been documented in morphological studies of otter spraints  
902 and stomachs, where smaller fish consumed by directly predated larger fish inflate  
903 prey diversity and bolster the relative importance of small fish as a resource (Carss  
904 and Parkinson 1996; Britton et al. 2006), but may be more pronounced in DNA  
905 metabarcoding studies due to the greater sensitivity of PCR amplification (Sheppard

906 et al. 2005; King et al. 2008; Pompanon et al. 2012). Secondary predation is  
907 challenging to identify in predators that feed on resources at multiple trophic levels,  
908 and can affect the inferences made from dietary assessments (Sheppard et al. 2005;  
909 Traugott et al. 2020). High sensitivity of DNA metabarcoding also facilitates  
910 amplification of contaminants present at minimal concentrations, originating from the  
911 environment (e.g. water swallowed with prey, substrate collected with faeces) or the  
912 laboratory (King et al. 2008; Pompanon et al. 2012; De Barba et al. 2014; Nielsen et  
913 al. 2018; Traugott et al. 2020). Despite physical separation of pre-PCR and post-  
914 PCR processes, and common preventative measures for contamination (cleaning  
915 workspaces and equipment with 10% bleach solution, filter tips, UV irradiation of  
916 plastics and reagents) (King et al. 2008; Pompanon et al. 2012; Traugott et al. 2020),  
917 we observed faecal samples were contaminated with our positive control DNA. Error  
918 during PCR and sequencing, such as primer mismatch (Piñol et al. 2018) and “tag  
919 jumps” (Schnell et al. 2015), can give rise to false positives, cross-contamination  
920 between samples, or laboratory contamination (Pompanon et al. 2012). We  
921 employed a stringent false positive sequence threshold, which removed false  
922 positives from secondary predation or contamination, but also removed potential  
923 prey species for the otter and mink that have been reported in previous  
924 morphological and metabarcoding studies, e.g. great crested newt (Smiroldo et al.  
925 2019), goldfish (Martínez-Abraín et al. 2020), common carp (Britton et al. 2006;  
926 Almeida et al. 2012), and common barbel (Ruiz-Olmo et al. 2001; Britton et al. 2017).  
927 This highlights the importance of minimising contamination for lower sequence  
928 thresholds and enhanced detection of prey taxa occurring at lower frequencies.

929  
930

## 931 **Conclusions**

932

933 We have demonstrated the potential of faecal DNA metabarcoding for investigation  
934 of diet and niche separation in mustelids as well as predator identification. Despite  
935 associated biological and technical challenges, DNA metabarcoding can enhance  
936 dietary insights and trophic networks to enable more effective conservation and  
937 management of predators and the resources on which they depend. Upscaled, year-  
938 round studies on the native otter and invasive mink that screen an equal number of  
939 faecal samples for each predator across broader spatial scales, including different  
940 freshwater habitats and environmental gradients (e.g. water quality, land-use), will  
941 further advance our understanding of resource use and niche overlap in these  
942 mustelids. Combining faecal DNA metabarcoding with eDNA metabarcoding of the  
943 associated fish fauna will provide further opportunities for more detailed study of prey  
944 selection and dietary preferences.

945

946

## 947 **Author contributions**

948

949 B.H and T.B conceived and designed the study. R.H and C.S assisted students with  
950 faecal sample collection and provided sample metadata. H.V.W performed DNA  
951 extractions and R.D constructed libraries for sequencing. L.R.H completed  
952 bioinformatic processing of samples, and analysed the data. L.R.H wrote the  
953 manuscript, which all authors contributed critically to drafts of and gave final approval  
954 for publication.

955



956

## 957 **Data accessibility**

958

959 Raw sequence reads have been archived on the NCBI Sequence Read Archive  
960 Study: SRP270831; BioProject: PRJNA644190; BioSamples: SAMN15452877-  
961 SAMN15453005 [Library 1] and SAMN15455442-SAMN15455596 [Library 2]; SRA  
962 accessions: SRR12168859-SRR12168984 [Library 1] and SRR12176017-  
963 SRR12176170 [Library 2]). Jupyter notebooks, R scripts and corresponding data  
964 have been deposited in a dedicated GitHub repository, which has been permanently  
965 archived (<https://doi.org/10.5281/zenodo.4252552>).

966

967

## 968 **Acknowledgements**

969

970 We would like to thank several undergraduate students from the University of Hull for  
971 collecting faecal samples from Malham Tarn and the River Hull catchment: Stefan  
972 Rooke, Zoe Latham, Nadine Grey, and Alicia Tredell. We are very grateful to the  
973 brilliant Terry Linford, Derek Sayer and Peter Bedell for collecting faecal samples  
974 from the River Glaven catchment. We also thank Yorkshire Water for contributing to  
975 the funding of this study.

976

977

## 978 **References**

979

980 Akrim F, Mahmood T, Max T, Nadeem MS, Qasim S, Andleeb S (2018) Assessment  
981 of bias in morphological identification of carnivore scats confirmed with molecular  
982 scatology in north-eastern Himalayan region of Pakistan. PeerJ 6: e5262.  
983 <https://doi.org/10.7717/peerj.5262>

984 Alderton E, Wicker C, Sayer C, Bradley P (2015) The diet of the Malham Tarn otters:  
985 understanding the impacts of a native predator. Field Studies. [http://fsj.field-](http://fsj.field-studies-council.org/)  
986 [studies-council.org/](http://fsj.field-studies-council.org/)

987 Almeida D, Copp GH, Masson L, Miranda R, Murai M, Sayer CD (2012) Changes in  
988 the diet of a recovering Eurasian otter population between the 1970s and 2010.  
989 Aquatic Conservation: Marine and Freshwater Ecosystems 22: 26–35.  
990 <https://doi.org/10.1002/aqc.1241>

991 Almeida D, Rodolfo N, Sayer CD, Copp GH (2013) Seasonal use of ponds as  
992 foraging habitat by Eurasian otter with description of an alternative handling  
993 technique for common toad predation. Folia Zoologica 62: 214–221.  
994 <https://doi.org/10.25225/fozo.v62.i3.a7.2013>

995 Baselga A, Orme CDL (2012) betapart : an R package for the study of beta diversity:  
996 Betapart package. Methods in Ecology and Evolution 3: 808–812.  
997 <https://doi.org/10.1111/j.2041-210X.2012.00224.x>

998 Bayerl H, Kraus RHS, Nowak C, Foerster DW, Fickel J, Kuehn R (2017) Fast and  
999 cost-effective single nucleotide polymorphism (SNP) detection in the absence of a  
1000 reference genome using semideep next-generation Random Amplicon  
1001 Sequencing (RAMseq). Molecular Ecology Resources 18: 107–117.  
1002 <https://doi.org/10.1111/1755-0998.12717>

- 1003 Berry TE, Osterrieder SK, Murray DC, Coghlan ML, Richardson AJ, Grealley AK, Stat  
1004 M, Bejder L, Bunce M (2017) DNA metabarcoding for diet analysis and  
1005 biodiversity: A case study using the endangered Australian sea lion (*Neophoca*  
1006 *cinerea*). *Ecology and Evolution* 7: 5435–5453. <https://doi.org/10.1002/ece3.3123>
- 1007 Bonesi L, Chanin P, Macdonald DW (2004) Competition between Eurasian otter  
1008 *Lutra lutra* and American mink *Mustela vison* probed by niche shift. *Oikos* 106:  
1009 19–26. <https://doi.org/10.1111/j.0030-1299.2004.12763.x>
- 1010 Bonesi L, Macdonald DW (2004a) Impact of released Eurasian otters on a  
1011 population of American mink: a test using an experimental approach. *Oikos* 106:  
1012 9–18. <https://doi.org/10.1111/j.0030-1299.2004.13138.x>
- 1013 Bonesi L, Macdonald DW (2004b) Differential habitat use promotes sustainable  
1014 coexistence between the specialist otter and the generalist mink. *Oikos* 106: 509–  
1015 519. <https://doi.org/10.1111/j.0030-1299.2004.13034.x>
- 1016 Bonesi L, Palazon S (2007) The American mink in Europe: Status, impacts, and  
1017 control. *Biological Conservation* 134: 470–483.  
1018 <https://doi.org/10.1016/j.biocon.2006.09.006>
- 1019 Britton JR, Pegg J, Shepherd JS (2006) Revealing the prey items of the otter *Lutra*  
1020 *lutra* in South West England using stomach contents analysis. *Folia Zoologica* 55:  
1021 167–174.
- 1022 Britton RJ, Berry M, Sewell S, Lees C, Reading P (2017) Importance of small fishes  
1023 and invasive crayfish in otter *Lutra lutra* diet in an English chalk stream.  
1024 *Knowledge and management of aquatic ecosystems* 418: 13.  
1025 <https://doi.org/10.1051/kmae/2017004>
- 1026 Bronner IF, Quail MA, Turner DJ, Swerdlow H (2009) Improved Protocols for Illumina  
1027 Sequencing. *Current Protocols in Human Genetics* 18: 18.2.1–18.2.42.  
1028 <https://doi.org/10.1002/0471142905.hg1802s62>
- 1029 Brzeziński M, Święcicka-Mazan A, Romanowski J (2008) Do Otters and Mink  
1030 Compete for Access to Foraging Sites? A Winter Case Study in the Mazurian  
1031 Lakeland, Poland. *Annales Zoologici Fennici* 45: 317–322.  
1032 <https://doi.org/10.5735/086.045.0412>
- 1033 Buglione M, Petrelli S, Troiano C, Notomista T, Riviuccio E, Fulgione D (2020) The  
1034 diet of otters (*Lutra lutra*) on the Agri river system, one of the most important  
1035 presence sites in Italy: a molecular approach. *PeerJ* 8: e9606.  
1036 <http://doi.org/10.7717/peerj.9606>
- 1037 Carss DN, Parkinson SG (1996) Errors associated with otter *Lutra lutra* faecal  
1038 analysis. I. Assessing general diet from spraints. *Journal of Zoology* 238: 301–  
1039 317. <https://doi.org/10.1111/j.1469-7998.1996.tb05396.x>
- 1040 Champkin J, Copp GH, Sayer CD, Clilverd H, Walker AM (2017) Responses of  
1041 fishes and lampreys to the re-creation of meanders in a small English chalk  
1042 stream. *River Research and Applications* 34: 34–43.  
1043 <https://doi.org/10.1002/rra.3216>
- 1044 Chanin P (1981) The diet of the otter and its relations with the feral mink in two areas  
1045 of southwest England. *Acta Theriologica* 26: 83–95.  
1046 <https://doi.org/10.4098/AT.arch.81-5>
- 1047 Clavero M, Prenda J, Delibes M (2003) Trophic diversity of the otter (*Lutra lutra* L.) in  
1048 temperate and Mediterranean freshwater habitats. *Journal of Biogeography* 30:  
1049 761–769. <https://doi.org/10.1046/j.1365-2699.2003.00865.x>

- 1050 Davison A, Birks JDS, Brookes RC, Braithwaite TC, Messenger JE (2002) On the  
1051 origin of faeces: morphological versus molecular methods for surveying rare  
1052 carnivores from their scats. *Journal of Zoology* 257: 141–143.  
1053 <https://doi.org/10.1017/S0952836902000730>
- 1054 Deagle BE, Thomas AC, McInnes JC, Clarke LJ, Vesterinen EJ, Clare EL, Kartzinel,  
1055 TR, Eveson, JP (2018) Counting with DNA in metabarcoding studies: how should  
1056 we convert sequence reads to dietary data? *Molecular Ecology* 28: 391–406.  
1057 <https://doi.org/10.1111/mec.14734>
- 1058 De Barba M, Miquel C, Boyer F, Mercier C, Rioux D, Coissac E, Taberlet P (2014)  
1059 DNA metabarcoding multiplexing and validation of data accuracy for diet  
1060 assessment: application to omnivorous diet. *Molecular Ecology Resources* 14:  
1061 306–323. <https://doi.org/10.1111/1755-0998.12188>
- 1062 Dormann CF, Frueund J, Bluethgen N, Gruber B (2009) Indices, graphs and null  
1063 models: analyzing bipartite ecological networks. *The Open Ecology Journal* 2: 7-  
1064 24. <https://doi.org/10.2174/1874213000902010007>
- 1065 Eldridge T (2016) Determining diet interactions of brown trout (*Salmo trutta*) and  
1066 Eurasian perch (*Perca fluviatilis*) in an upland marl lake using stable isotope  
1067 analysis. MSc Thesis, University College London.
- 1068 Ficetola GF, Pansu J, Bonin A, Coissac E, Giguët-Covex C, De Barba M, Gielly L,  
1069 Lopes CM, Boyer F, Pompanon F, Rayé G, Taberlet P (2015) Replication levels,  
1070 false presences and the estimation of the presence/absence from eDNA  
1071 metabarcoding data. *Molecular Ecology Resources* 15: 543–556.  
1072 <https://doi.org/10.1111/1755-0998.12338>
- 1073 Forin-Wiart M-A, Poulle M-L, Piry S, Cosson J-F, Larose C, Galan M (2018)  
1074 Evaluating metabarcoding to analyse diet composition of species foraging in  
1075 anthropogenic landscapes using Ion Torrent and Illumina sequencing. *Scientific*  
1076 *Reports* 8: 17091. <https://doi.org/10.1038/s41598-018-34430-7>
- 1077 Gosselin EN, Lonsinger RC, Waits LP (2017) Comparing morphological and  
1078 molecular diet analyses and fecal DNA sampling protocols for a terrestrial  
1079 carnivore: Noninvasive Diet Analysis Methodologies. *Wildlife Society Bulletin* 41:  
1080 362–369. <https://doi.org/10.1002/wsb.749>
- 1081 Griffiths, NP, Bolland J, Wright R, Murphy LA, Donnelly RK, Watson HV, Hänfling B  
1082 (2020) Environmental DNA metabarcoding provides enhanced detection of the  
1083 European eel *Anguilla anguilla* and fish community structure in pumped river  
1084 catchments. Under review at *Journal of Fish Biology*.
- 1085 Hänfling B, Lawson Handley L, Read DS, Hahn C, Li J, Nichols P, Blackman, RC,  
1086 Oliver A, Winfield IJ (2016) Environmental DNA metabarcoding of lake fish  
1087 communities reflects long-term data from established survey methods. *Molecular*  
1088 *Ecology* 25: 3101–3119. <https://doi.org/10.1111/mec.13660>
- 1089 Hänfling B, Lawson Handley L, Harper LR, Benucci M, Sellers GS, Di Muri C,  
1090 Griffiths NP, Jaques R, James J (2020) Development of an eDNA-based lake fish  
1091 classification tool – Collection of data from English Lakes. Final Report, February  
1092 2020. Written for the Environment Agency, UK (unpublished).
- 1093 Harper LR, Handley LL, Carpenter Al., Ghazali M, Di Muri C, Macgregor CJ, Logan  
1094 TW, Law A, Breithaupt T, Read DS, McDevitt AD, Hänfling B (2019a)  
1095 Environmental DNA (eDNA) metabarcoding of pond water as a tool to survey  
1096 conservation and management priority mammals. *Biological Conservation* 238:  
1097 108225. <https://doi.org/10.1016/j.biocon.2019.108225>

- 1098 Harper LR, Lawson Handley L, Hahn C, Boonham N, Rees HC, Lewis E, Adams IP,  
1099 Brotherton P, Phillips S, Hänfling B (2019b) Generating and testing ecological  
1100 hypotheses at the pondscape with environmental DNA metabarcoding: A case  
1101 study on a threatened amphibian. *Environmental DNA* 2: 184–199.  
1102 <https://doi.org/10.1002/edn3.57>
- 1103 Harrington LA, Harrington AL, Yamaguchi N, Thom MD, Ferreras P, Windham TR,  
1104 Macdonald DW (2009) The impact of native competitors on an alien invasive:  
1105 temporal niche shifts to avoid interspecific aggression? *Ecology* 90: 1207–1216.  
1106 <https://doi.org/10.1890/08-0302.1>
- 1107 Harrington LA, Harrington AL, Hughes J, Stirling D, Macdonald DW (2010) The  
1108 accuracy of scat identification in distribution surveys: American mink, *Neovison*  
1109 *vison*, in the northern highlands of Scotland. *European Journal of Wildlife*  
1110 *Research* 56: 377–384. <https://doi.org/10.1007/s10344-009-0328-6>
- 1111 Harwood A, Berridge R, Perrow M, Piper A, Sayer, CD (2019) Understanding  
1112 European eel (*Anguilla anguilla*) ecology within a Norfolk river catchment to inform  
1113 eel management. ENG2083, Draft Final Report, August 2019.
- 1114 Hsieh TC, Ma KH, Chao A (2016) iNEXT: an R package for rarefaction and  
1115 extrapolation of species diversity (Hill numbers). *Methods in Ecology and*  
1116 *Evolution* 7: 1451–1456. <https://doi.org/10.1111/2041-210X.12613>
- 1117 Jędrzejewska B, Sidorovich VE, Pikulik MM, Jędrzejewska W (2001) Feeding habits  
1118 of the otter and the American mink in Białowieża Primeval Forest (Poland)  
1119 compared to other Eurasian populations. *Ecography* 24: 165–180.  
1120 <https://www.istor.org/stable/3683692>
- 1121 Kean EF, Chadwick EA, Mueller CT (2015) Scent signals individual identity and  
1122 country of origin in otters. *Mammalian Biology* 80: 99–105.  
1123 <https://doi.org/10.1016/j.mambio.2014.12.004>
- 1124 King RA, Read DS, Traugott M, Symondson WOC (2008) Molecular analysis of  
1125 predation: a review of best practice for DNA-based approaches. *Molecular*  
1126 *Ecology* 17: 947–963. <https://doi.org/10.1111/j.1365-294x.2007.03613.x>
- 1127 Krawczyk AJ, Bogdziewicz M, Majkowska K, Glazaczow A (2016) Diet composition  
1128 of the Eurasian otter *Lutra lutra* in different freshwater habitats of temperate  
1129 Europe: a review and meta-analysis. *Mammal Review* 46: 106–113.  
1130 <https://doi.org/10.1111/mam.12054>
- 1131 Kruuk H (2006) Otters: ecology, behaviour, and conservation. Oxford University  
1132 Press, Oxford.
- 1133 Lanszki J, Körmendi S, Hancz C, Martin TG (2001) Examination of some factors  
1134 affecting selection of fish prey by otters (*Lutra lutra*) living by eutrophic fish ponds.  
1135 *Journal of Zoology* 255: 97–103. <https://doi.org/10.1017/S0952836901001145>
- 1136 Lanszki J, Lehoczky I, Kotze A, Somers MJ (2016) Diet of otters (*Lutra lutra*) in  
1137 various habitat types in the Pannonian biogeographical region compared to other  
1138 regions of Europe. *PeerJ* 4: e2266. <https://doi.org/10.7717/peerj.2266>
- 1139 Li J, Hatton-Ellis TW, Lawson Handley L-J, Kimbell HS, Benucci M, Peirson G,  
1140 Hänfling B (2019) Ground-truthing of a fish-based environmental DNA  
1141 metabarcoding method for assessing the quality of lakes. *Journal of Applied*  
1142 *Ecology* 56: 1232–1244. <https://doi.org/10.1111/1365-2664.13352>
- 1143 Martínez-Abraín A, Santidrián Tomillo P, Veiga J (2019) Otter diet changes in a  
1144 reservoir during a severe autumn drought. *Journal of Mammalogy* 101: 211–215.  
1145 <https://doi.org/10.1093/jmammal/gyz185>



- 1146 Martínez-Abraín A, Marí-Mena N, Vizcaíno A, Vierna J, Veloy C, Amboage M,  
1147 Guitián-Caamaño A, Key C, Vila M (2020) Determinants of Eurasian otter (*Lutra*  
1148 *lutra*) diet in a seasonally changing reservoir. *Hydrobiologia* 847: 1803–1816.  
1149 <https://doi.org/10.1007/s10750-020-04208-y>
- 1150 Martínez-Gutiérrez PG, Palomares F, Fernández N (2015) Predator identification  
1151 methods in diet studies: uncertain assignment produces biased results?  
1152 *Ecography* 38: 922–929. <https://doi.org/10.1111/ecog.01040>
- 1153 Mathews F, Harrower C (2020) *Regional Red List of British Mammals*. The Mammal  
1154 Society. <https://www.mammal.org.uk/science-research/red-list/>
- 1155 McDonald RA, O'Hara K, Morrish DJ (2007) Decline of invasive alien mink (*Mustela*  
1156 *vison*) is concurrent with recovery of native otters (*Lutra lutra*). *Diversity and*  
1157 *Distributions* 13: 92–98. <https://doi.org/10.1111/j.1366-9516.2006.00303.x>
- 1158 McInnes JC, Alderman R, Deagle BE, Lea M-A, Raymond B, Jarman SN (2016)  
1159 Optimised scat collection protocols for dietary DNA metabarcoding in vertebrates.  
1160 *Methods in Ecology and Evolution* 8: 192–202. [https://doi.org/10.1111/2041-](https://doi.org/10.1111/2041-210X.12677)  
1161 [210X.12677](https://doi.org/10.1111/2041-210X.12677)
- 1162 McInnes JC, Jarman SN, Lea M-A, Raymond B, Deagle BE, Phillips RA, Catry P,  
1163 Stanworth A, Weimerskirch H, Kusch A, Gras M, Cherel Y, Maschette D,  
1164 Alderman R (2017) DNA Metabarcoding as a Marine Conservation and  
1165 Management Tool: A Circumpolar Examination of Fishery Discards in the Diet of  
1166 Threatened Albatrosses. *Frontiers in Marine Science* 4: 277.  
1167 <https://doi.org/10.3389/fmars.2017.00277>
- 1168 Melero Y, Palazón S, Bonesi L, Gosàlbez J (2008) Feeding habits of three sympatric  
1169 mammals in NE Spain: the American mink, the spotted genet, and the Eurasian  
1170 otter. *Acta Theriologica* 53: 263–273. <https://doi.org/10.1007/BF03193123>
- 1171 Nakagawa S, Cuthill IC (2007) Effect size, confidence interval and statistical  
1172 significance: a practical guide for biologists. *Biological Reviews* 82: 591–605  
1173 <https://doi.org/10.1111/j.1469-185X.2007.00027.x>
- 1174 Nielsen JM, Clare EL, Hayden B, Brett MT, Kratina P (2018) Diet tracing in ecology:  
1175 Method comparison and selection. *Methods in Ecology and Evolution* 9: 278–291.  
1176 <https://doi.org/10.1111/2041-210X.12869>
- 1177 Oehm J, Juen A, Nagiller K, Neuhauser S, Traugott M (2011) Molecular scatology:  
1178 how to improve prey DNA detection success in avian faeces? *Molecular Ecology*  
1179 *Resources* 11: 620–628. <https://doi.org/10.1111/j.1755-0998.2011.03001.x>
- 1180 Ogle DH, Wheeler P, Dinno A (2020) FSA: Fisheries Stock Analysis. R package  
1181 version 0.8.30. <https://github.com/droglenc/FSA>
- 1182 Piñol J, Mir G, Gomez-Polo P, Agustí N (2015) Universal and blocking primer  
1183 mismatches limit the use of high-throughput DNA sequencing for the quantitative  
1184 metabarcoding of arthropods. *Molecular Ecology Resources* 15: 819–  
1185 830. <https://doi.org/10.1111/1755-0998.12355>
- 1186 Piñol J, San Andrés V, Clare EL, Mir G, Symondson WOC (2014) A pragmatic  
1187 approach to the analysis of diets of generalist predators: the use of next-  
1188 generation sequencing with no blocking probes. *Molecular Ecology Resources* 14:  
1189 18–26. <https://doi.org/10.1111/1755-0998.12156>
- 1190 Piñol J, Senar MA, Symondson WOC (2018) The choice of universal primers and the  
1191 characteristics of the species mixture determines when DNA metabarcoding can  
1192 be quantitative. *Molecular Ecology* 28: 407–419.  
1193 <https://doi.org/10.1111/mec.14776>

- 1194 Pompanon F, Deagle BE, Symondson WOC, Brown DS, Jarman SN, Taberlet P  
1195 (2012) Who is eating what: diet assessment using next generation sequencing.  
1196 Molecular Ecology 21: 1931–1950. [https://doi.org/10.1111/j.1365-](https://doi.org/10.1111/j.1365-294X.2011.05403.x)  
1197 [294X.2011.05403.x](https://doi.org/10.1111/j.1365-294X.2011.05403.x)
- 1198 Prigioni C, Balestrieri A, Remonti L, Gargaro A, Priore G (2006) Diet of the Eurasian  
1199 otter (*Lutra lutra*) in relation to freshwater habitats and alien fish species in  
1200 southern Italy. Ethology Ecology & Evolution 18: 307–320.  
1201 <https://doi.org/10.1080/08927014.2006.9522698>
- 1202 Reid N, Thompson D, Hayden B, Marnell F, Montgomery WI (2013) Review and  
1203 quantitative meta-analysis of diet suggests the Eurasian otter (*Lutra lutra*) is likely  
1204 to be a poor bioindicator. Ecological indicators 26: 5–13.  
1205 <https://doi.org/10.1016/j.ecolind.2012.10.017>
- 1206 Remonti L, Prigioni C, Balestrieri A, Sgroso S, Priore G (2010) Eurasian otter (*Lutra*  
1207 *lutra*) prey selection in response to a variation of fish abundance. Italian Journal of  
1208 Zoology 77: 331–338. <https://doi.org/10.1080/11250000903229809>
- 1209 Reynolds JC, Short MJ, Leigh RJ (2004) Development of population control  
1210 strategies for mink *Mustela vison*, using floating rafts as monitors and trap sites.  
1211 Biological Conservation 120: 533–543.  
1212 <https://doi.org/10.1016/j.biocon.2004.03.026>
- 1213 Riaz T, Shehzad W, Viari A, Pompanon F, Taberlet P, Coissac E (2011) ecoPrimers:  
1214 inference of new DNA barcode markers from whole genome sequence analysis.  
1215 Nucleic Acids Research 39: e145. <https://doi.org/10.1093/nar/gkr732>
- 1216 Robeson MS 2nd, Khanipov K, Golovko G, Wisely SM, White MD, Bodenchuck M,  
1217 Smyser TJ, Fofanov Y, Fierer N, Piaggio, AJ (2018) Assessing the utility of  
1218 metabarcoding for diet analyses of the omnivorous wild pig (*Sus scrofa*). Ecology  
1219 and Evolution 8: 185–196. <https://doi.org/10.1002/ece3.3638>
- 1220 Ruiz-Olmo J, López-Martín JM, Palazón S (2001) The influence of fish abundance  
1221 on the otter (*Lutra lutra*) populations in Iberian Mediterranean habitats. Journal of  
1222 Zoology 254: 325–336. <https://doi.org/10.1017/S095283690100083>
- 1223 Sayer CD, Copp GH, Emson D, Godard MJ, Zięba G, Wesley KJ (2011) Towards the  
1224 conservation of crucian carp *Carassius carassius*: understanding the extent and  
1225 causes of decline within part of its native English range. Journal of Fish Biology  
1226 79: 1608–1624. <https://doi.org/10.1111/j.1095-8649.2011.03059.x>
- 1227 Sayer CD, Emson D, Patmore IR, Greaves H, Wiseman G, West WP, Tarkan AS,  
1228 Davies GD, Payne J, Cooper B, Grapes T, Copp GH (2020) Recovering the  
1229 crucian carp *Carassius carassius* (L.): approach and early results of an English  
1230 conservation project. Aquatic Conservation: Marine and Freshwater Ecosystems.  
1231 <https://doi.org/10.1002/aqc.3422>
- 1232 Schnell IB, Bohmann K, Gilbert MTP (2015) Tag jumps illuminated--reducing  
1233 sequence-to-sample misidentifications in metabarcoding studies. Molecular  
1234 Ecology Resources 15: 1289–1303. <https://doi.org/10.1111/1755-0998.12402>
- 1235 Schwarz D, Spitzer SM, Thomas AC, Kohnert CM, Keates TR, Acevedo-Gutiérrez A  
1236 (2018) Large-scale molecular diet analysis in a generalist marine mammal reveals  
1237 male preference for prey of conservation concern. Ecology and Evolution 8: 9889-  
1238 9905. <https://doi.org/10.1002/ece3.4474>
- 1239 Sellers GS, Di Muri C, Gómez A, Hänfling B (2018) Mu-DNA: a modular universal  
1240 DNA extraction method adaptable for a wide range of sample types.  
1241 Metabarcoding and Metagenomics 2: e24556.  
1242 <https://doi.org/10.3897/mbmg.2.24556>

- 1243 Shehzad W, McCarthy TM, Pompanon F, Purevjav L, Coissac E, Riaz T, Taberlet P  
1244 (2012a) Prey preference of snow leopard (*Panthera uncia*) in South Gobi,  
1245 Mongolia. PLoS ONE 7: e32104. <https://doi.org/10.1371/journal.pone.0032104>  
1246 Shehzad W, Riaz T, Nawaz MA, Miquel C, Poillot C, Shah SA, Pompanon F,  
1247 Coissac E, Taberlet P (2012b) Carnivore diet analysis based on next-generation  
1248 sequencing: application to the leopard cat (*Prionailurus bengalensis*) in Pakistan.  
1249 Molecular Ecology 21: 1951–1965. [https://doi.org/10.1111/j.1365-  
1250 294X.2011.05424.x](https://doi.org/10.1111/j.1365-294X.2011.05424.x)  
1251 Sheppard SK, Bell J, Sunderland KD, Fenlon J, Skervin D, Symondson WOC (2005)  
1252 Detection of secondary predation by PCR analyses of the gut contents of  
1253 invertebrate generalist predators. Molecular Ecology 14: 4461–4468.  
1254 <https://doi.org/10.1111/j.1365-294X.2005.02742.x>  
1255 Sidorovich VE (2000) Seasonal variation in the feeding habits of riparian mustelids in  
1256 river valleys of NE Belarus. Acta Theriologica 45: 233–242.  
1257 <https://doi.org/10.4098/AT.arch.00-25>  
1258 Skierczyński M, Wiśniewska A (2010) Trophic niche comparison of American mink  
1259 and Eurasian otter under different winter conditions. *Mammalia* 74: 433–437.  
1260 <https://doi.org/10.1515/mamm.2010.043>  
1261 Smiroldo G, Villa A, Tremolada P, Gariano P, Balestrieri A, Delfino M (2019)  
1262 Amphibians in Eurasian otter *Lutra lutra* diet: osteological identification unveils  
1263 hidden prey richness and male-biased predation on anurans. *Mammal Review* 49:  
1264 240–255. <https://doi.org/10.1111/mam.12155>  
1265 Traugott M, Thalinger B, Wallinger C, Sint D (2020) Fish as predators and prey:  
1266 DNA-based assessment of their role in food webs. *Journal of Fish Biology*.  
1267 <https://doi.org/10.1111/jfb.14400>  
1268 Wickham H (2009) ggplot2: Elegant Graphics for Data Analysis. Springer, New York.  
1269 Zambrano L, Perrow MR, Sayer CD, Tomlinson ML, Davidson TA (2006)  
1270 Relationships between fish feeding guild and trophic structure in English lowland  
1271 shallow lakes subject to anthropogenic influence: implications for lake restoration.  
1272 *Aquatic Ecology* 40: 391–405. <https://doi.org/10.1007/s10452-006-9037-3>  
1273  
1274

1275 **Table 1.** Summary of analyses statistically comparing homogeneity of multivariate  
 1276 dispersions between prey communities in otter and mink faecal samples (ANOVA),  
 1277 and variation in prey community composition of otter and mink faecal samples  
 1278 (PERMANOVA).  
 1279

|                             | Homogeneity of multivariate dispersions (ANOVA) |    |       |              | Community similarity (PERMANOVA) |        |                |              |
|-----------------------------|-------------------------------------------------|----|-------|--------------|----------------------------------|--------|----------------|--------------|
|                             | Mean distance to centroid $\pm$ SE              | df | F     | P            | df                               | F      | R <sup>2</sup> | P            |
| <i>Turnover</i>             |                                                 | 1  | 7.316 | <b>0.008</b> | 1                                | 5.587  | 0.030          | <b>0.001</b> |
| Otter                       | 0.516 $\pm$ 0.031                               |    |       |              |                                  |        |                |              |
| Mink                        | 0.636 $\pm$ 0.003                               |    |       |              |                                  |        |                |              |
| <i>Nestedness-resultant</i> |                                                 | 1  | 0.018 | 0.895        | 1                                | -3.097 | -0.017         | 0.915        |
| Otter                       | 0.107 $\pm$ 0.014                               |    |       |              |                                  |        |                |              |
| Mink                        | 0.103 $\pm$ 0.006                               |    |       |              |                                  |        |                |              |
| <i>Total beta diversity</i> |                                                 | 1  | 6.401 | <b>0.012</b> | 1                                | 4.274  | 0.023          | <b>0.001</b> |
| Otter                       | 0.574 $\pm$ 0.014                               |    |       |              |                                  |        |                |              |
| Mink                        | 0.651 $\pm$ 0.001                               |    |       |              |                                  |        |                |              |

1280  
 1281



1282 **Table 2.** Summary of analyses statistically comparing homogeneity of multivariate  
 1283 dispersions between prey communities in otter samples from different sites  
 1284 (ANOVA), and variation in prey community composition of otter samples from  
 1285 different sites (PERMANOVA).  
 1286

|                             | Homogeneity of multivariate dispersions (ANOVA) |    |        |                  | Community similarity (PERMANOVA) |         |                |              |
|-----------------------------|-------------------------------------------------|----|--------|------------------|----------------------------------|---------|----------------|--------------|
|                             | Mean distance to centroid ± SE                  | df | F      | P                | df                               | F       | R <sup>2</sup> | P            |
| <i>Turnover</i>             |                                                 | 2  | 22.620 | <b>&lt;0.001</b> | 2                                | 10.668  | 0.115          | <b>0.001</b> |
| Malham Tarn                 | 0.220 ± 0.042                                   |    |        |                  |                                  |         |                |              |
| River Glaven                | 0.516 ± 0.031                                   |    |        |                  |                                  |         |                |              |
| River Hull                  | 0.491 ± 0.035                                   |    |        |                  |                                  |         |                |              |
| <i>Nestedness-resultant</i> |                                                 | 2  | 11.263 | <b>&lt;0.001</b> | 2                                | -13.730 | -0.201         | 1.000        |
| Malham Tarn                 | 0.234 ± 0.028                                   |    |        |                  |                                  |         |                |              |
| River Glaven                | 0.079 ± 0.012                                   |    |        |                  |                                  |         |                |              |
| River Hull                  | 0.117 ± 0.015                                   |    |        |                  |                                  |         |                |              |
| <i>Total beta diversity</i> |                                                 | 2  | 23.358 | <b>&lt;0.001</b> | 2                                | 7.819   | 0.087          | <b>0.001</b> |
| Malham Tarn                 | 0.343 ± 0.052                                   |    |        |                  |                                  |         |                |              |
| River Glaven                | 0.564 ± 0.018                                   |    |        |                  |                                  |         |                |              |
| River Hull                  | 0.560 ± 0.015                                   |    |        |                  |                                  |         |                |              |

1287  
 1288

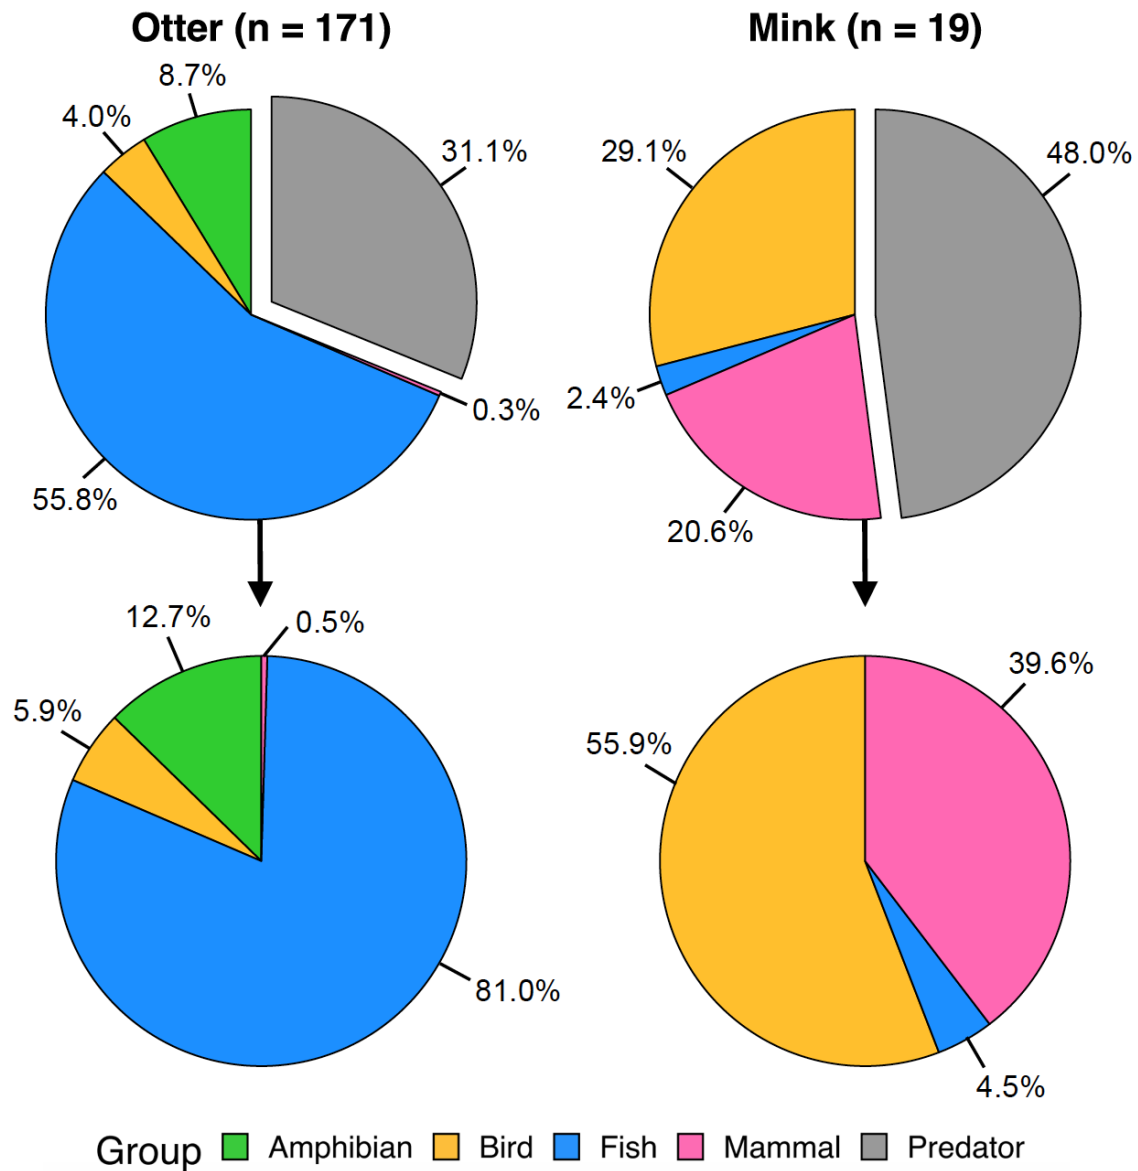

1289  
1290  
1291  
1292  
1293  
1294  
1295  
1296

**Figure 1.** Pie charts showing the proportion of total reads retained in the refined dataset that belonged to the otter and mink with respect to their vertebrate prey, and the proportion of prey reads that belonged to different vertebrate groups.

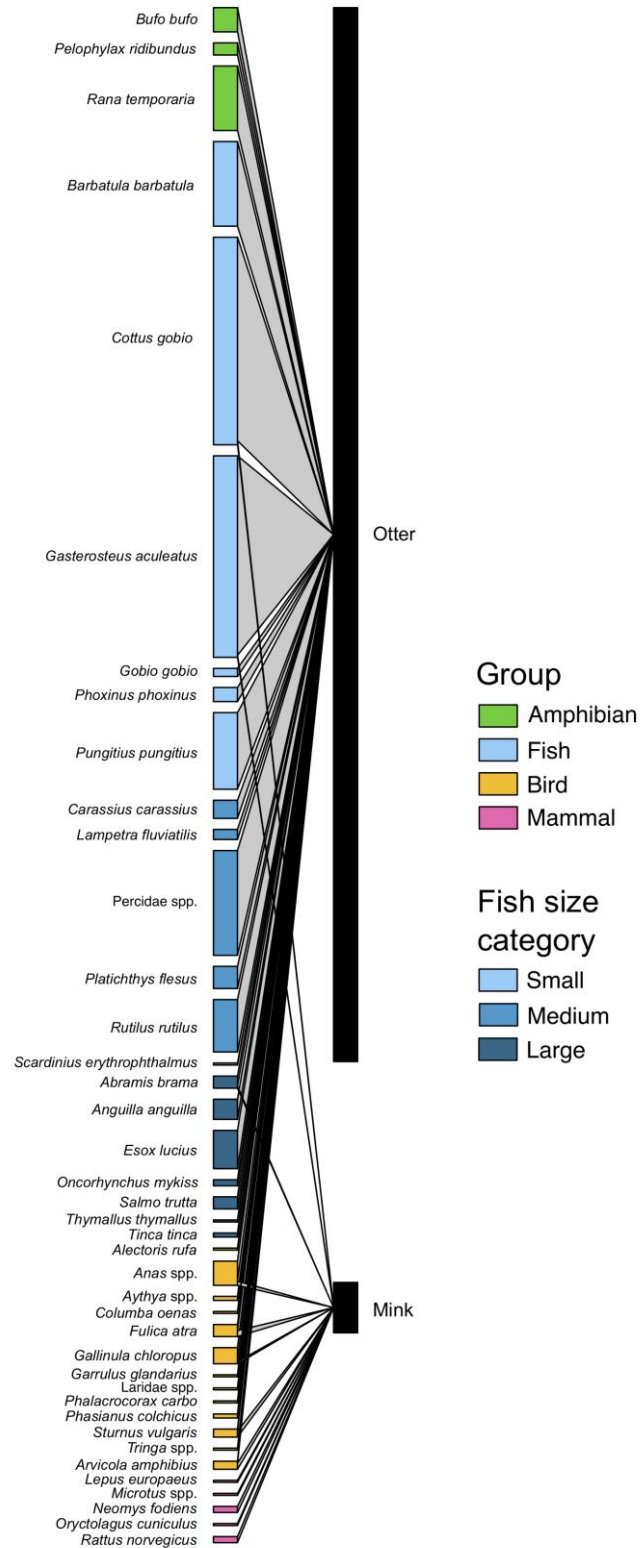

1297  
 1298  
 1299  
 1300  
 1301  
 1302  
 1303  
 1304

**Figure 2.** A bipartite trophic network showing the prey of the otter and mink. The black blocks on the right column represent the predators and the coloured blocks in the left column represent the prey taxa. Detected predation events are indicated by lines that connect a predator with a prey taxon, and the number of events is proportional to the thickness of the line. Prey taxa are coloured according to vertebrate group, and different shades of blue indicate fish size category.

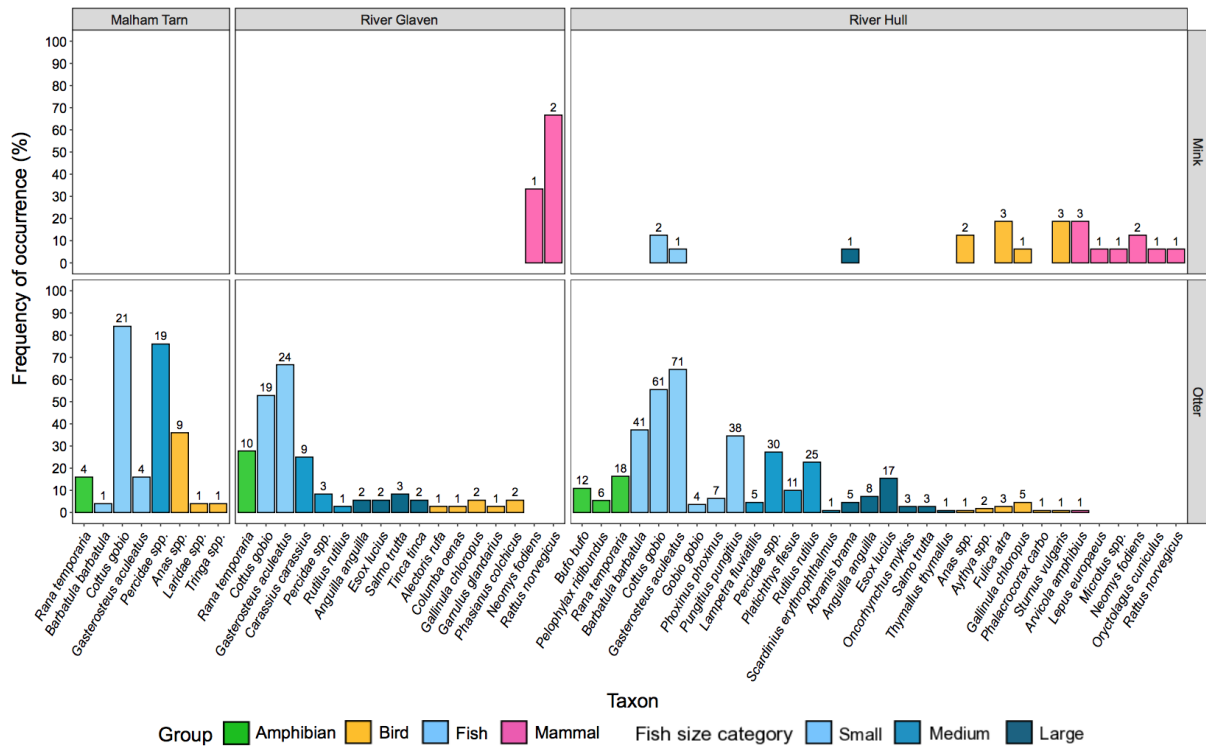

1305  
1306  
1307  
1308  
1309  
1310  
1311  
1312

**Figure 3.** Barplot showing the occurrence percentage of prey taxa in mink and otter samples collected from different sites. Bars are coloured according to vertebrate group, and different shades of blue indicate fish size category. Numbers above bars represent the number of samples where prey taxa were detected.



**Method**

- DNA metabarcoding
- Combined fish surveys

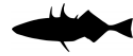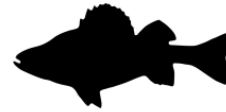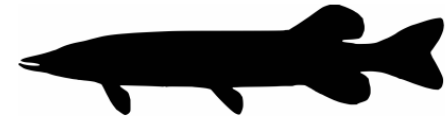

**A Malham Tarn**

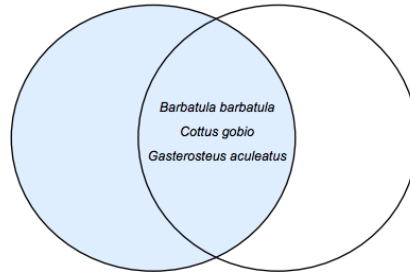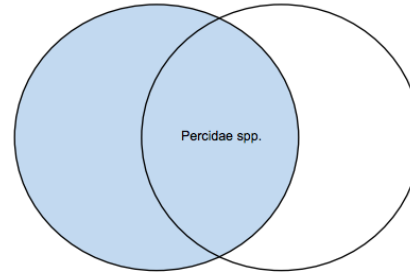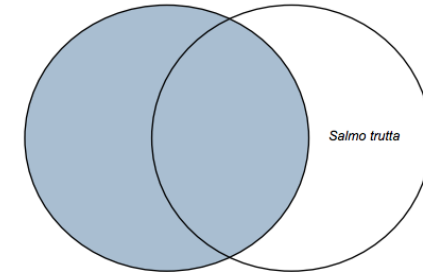

**B River Glaven**

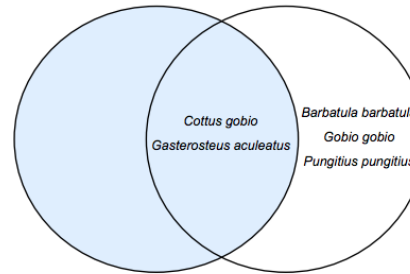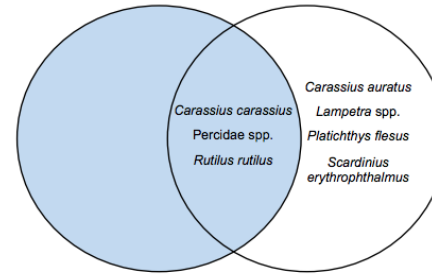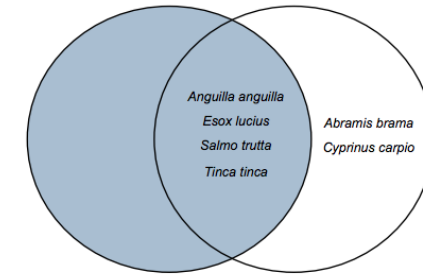

**C River Hull**

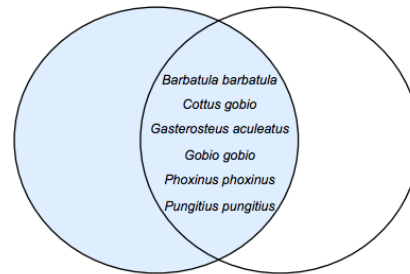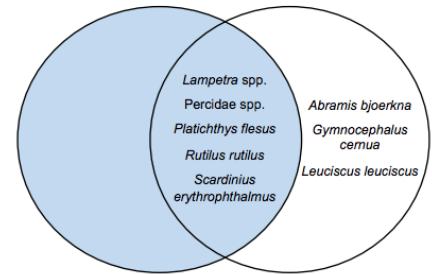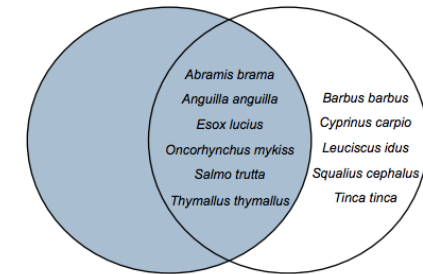

1313  
 1314  
 1315  
 1316

**Figure 4.** Venn diagrams showing fish species belonging to different size categories that were detected by DNA metabarcoding of otter spraints (blue circles) or fish surveys (white circles) at **A** Malham Tarn, **B** River Glaven, and **C** River Hull.

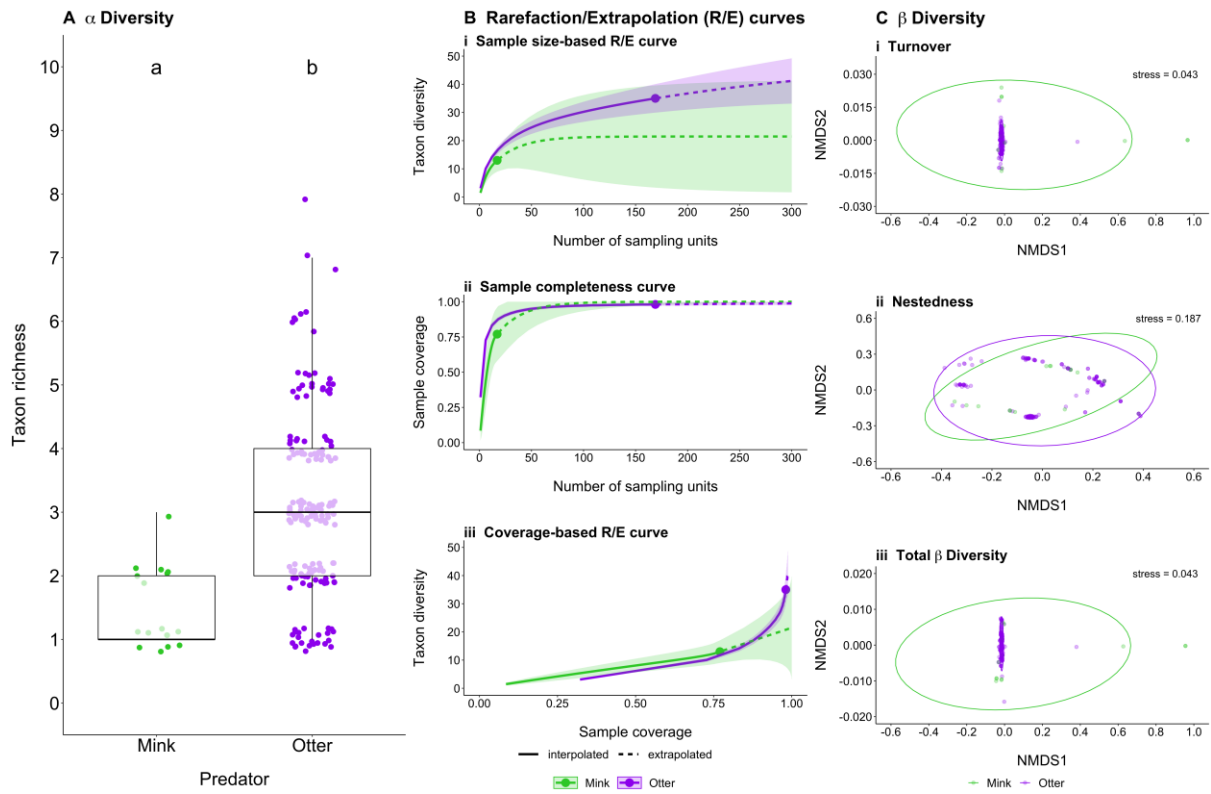

1317  
1318  
1319  
1320  
1321  
1322  
1323  
1324  
1325  
1326  
1327  
1328  
1329

**Figure 5.** Summaries of alpha and beta diversity comparisons made between otter (purple points/ellipses) and mink (green points/ellipses) faecal samples: **A** boxplot showing the number of prey taxa detected in mink and otter samples, **B** rarefaction/extrapolation (R/E) curves produced for otter spraints and mink scats using iNEXT (Hsieh et al. 2016), and **C** Non-metric Multidimensional Scaling (NMDS) plots of prey communities from otter and mink faecal samples for each beta diversity component. Letters denote significance, where different letters indicate a statistically significant difference in taxon richness. Boxes show 25th, 50th, and 75th percentiles, and whiskers show 5th and 95th percentiles.

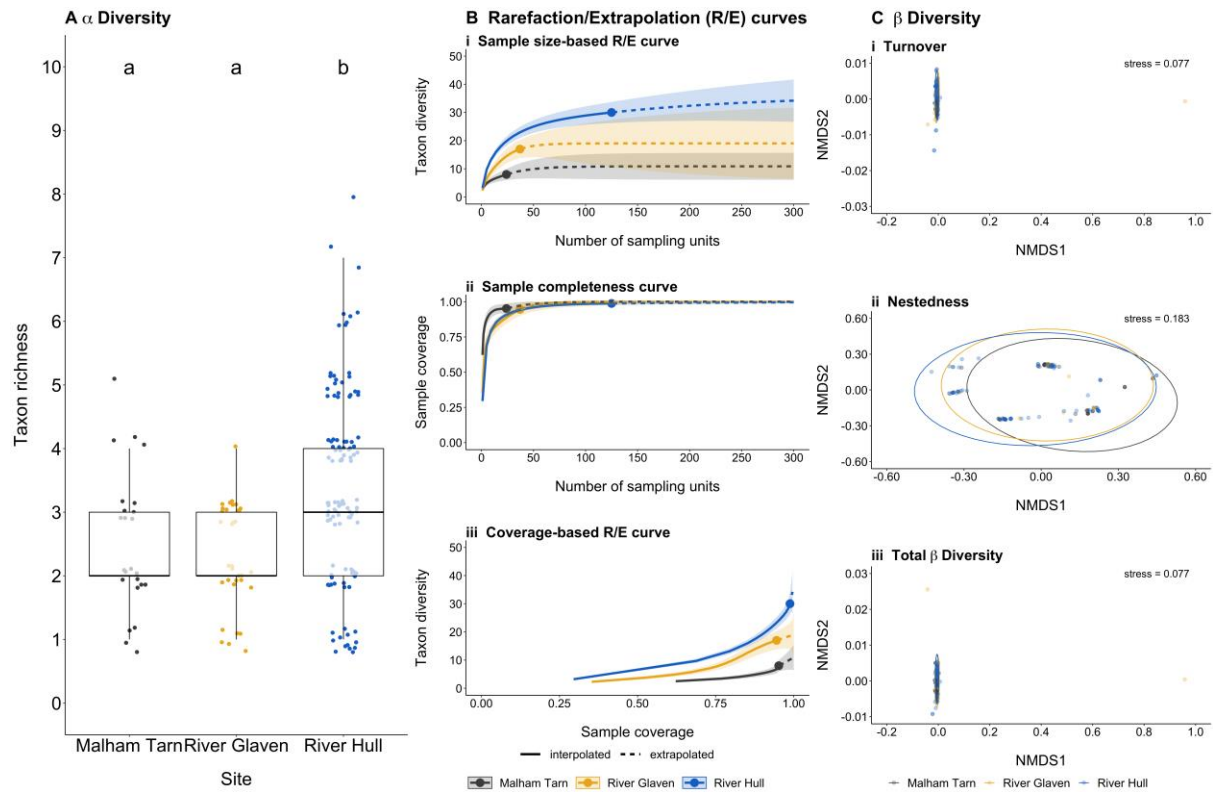

1330  
1331  
1332  
1333  
1334  
1335  
1336  
1337  
1338  
1339  
1340  
1341  
1342  
1343

**Figure 6.** Summaries of alpha and beta diversity comparisons made between otter samples collected from Malham Tarn (grey points/ellipses), River Glaven (yellow points/ellipses), and River Hull (blue points/ellipses): **A** boxplot showing the number of prey taxa detected in samples from each site, **B** rarefaction/extrapolation (R/E) curves produced for otter spraints from Malham Tarn, the River Glaven, and the River Hull using iNEXT (Hsieh et al. 2016), and **C** Non-metric Multidimensional Scaling (NMDS) plots of prey communities in samples from each site for each beta diversity component. Letters denote significance, where different letters indicate a statistically significant difference in taxon richness. Boxes show 25th, 50th, and 75th percentiles, and whiskers show 5th and 95th percentiles.
